1 **Research Article**

2 **Cultivating *in situ* triggers growth of previously uncultivated**  
3 **microorganisms via a growth initiation factor in nature**

4

5 Dawoon Jung<sup>1</sup>, Koshi Machida<sup>2</sup>, Yoichi Nakao<sup>2,3</sup>, Tomonori Kindaichi<sup>4</sup>, Akiyoshi Ohashi<sup>4</sup>,  
6 Yoshiteru Aoi<sup>1\*</sup>

7

8 <sup>1</sup>Department of Molecular Biotechnology, Graduate School of Advanced Sciences of Matter,  
9 Hiroshima University, Japan

10 <sup>2</sup>Research Institute for Science and Engineering, Waseda University, Japan

11 <sup>3</sup>Department of Chemistry and Biochemistry, Graduate School of Advanced Science and  
12 Engineering, Waseda University, Japan

13 <sup>4</sup>Department of Civil and Environmental Engineering, Graduate School of Engineering,  
14 Hiroshima University, Japan

15

16 Running title: Growth initiation by *in situ* cultivation

17

18 \*Corresponding author: Yoshiteru Aoi (yoshiteruaoi@hiroshima-u.ac.jp)

19

20 Keywords: uncultured microbes, cultivation, resuscitation, nongrowing, dormancy,

21 diffusion chamber

22

## 23 **Abstract**

24 Most microorganisms resist cultivation under standard laboratory conditions. On the other  
25 hand, to cultivate microbes in a membrane-bound device incubated in nature (*in situ*  
26 cultivation) is an effective approach. In the present study, we applied *in situ* cultivation to  
27 isolate diverse previously uncultivated marine sponge-associated microbes and comparatively  
28 analyzed this method's efficiencies with those of the conventional method. Then, we  
29 attempted to clarify the key and unknown mechanism of *in situ* cultivation by focusing on  
30 growth triggering via growth initiation factor. We hypothesized that majority of  
31 environmental microorganisms are in nongrowing state and requiring "growth initiation  
32 factor" for the recovery and that can be provided from environments. Consequently,  
33 significantly more novel and diverse microbial types were isolated via *in situ* cultivation than  
34 by standard direct plating (SDP). Next, the effect of the sponge extract on starvation recovery  
35 was compared between strains derived from *in situ* and SDP cultivation. Adding small  
36 amounts of the sponge extracts to the medium elevated the colony-formation efficiencies of  
37 the *in situ* strains at the starvation recovery step, while it showed no positive effect on that of  
38 SDP strains. Conversely, specific growth rates or carrying capacities of all tested strains were  
39 not positively affected. These results indicate that, 1) the sponge extract contains chemical  
40 compounds that facilitate starvation recovery, these substances selectively worked on the *in*  
41 *situ* strains, and 2) growth initiation factor in the sponge extract did not continuously promote  
42 growth activity but worked as triggers for regrowth (resuscitation from dormancy).

43

## 44 **Importance**

45 Most microbial species resist cultivation under laboratory condition. This is critical

46 impediment for both academic and applied microbiology, and thus clarification of the  
47 mechanism of microbial uncultivability is highly demanded. Several evidences have been  
48 reported that to cultivate microbes in a membrane-bound device incubated in nature (*in situ*  
49 cultivation) is an effective approach. However, the mechanism behind this approach has not  
50 been clarified. The present study shows the evidence that 1) initiating growth is a key for  
51 cultivating previously uncultivated microbes rather than simple growth promotion, and 2)  
52 growth initiation factor (signaling-like compounds) in natural environments stimulate  
53 microbial resuscitation from a nongrowing state. Since no study has focused on growth  
54 initiation for cultivation of previously uncultivated microorganisms, the discovery shown in  
55 the present study provides a new insight into microorganisms previously considered  
56 uncultivable and a microbial growth controlling system in nature.

57

## 58 **Introduction**

59 Most microbes remain uncultivated and have been referred to as ‘mysterious dark matter’ of  
60 the microbial world (1, 2). Cultivation independent survey have demonstrated great diversity  
61 among these uncultivated species (3-5). Accessing this “missing” microbial diversity is of  
62 great interest to both basic and applied sciences and has been regarded as a major challenge  
63 for microbiology.

64 Standard agar plating as a conventional method of cultivating microorganisms is limited  
65 because a significantly low proportion (usually less than 1%) of the plated microbes readily  
66 form visible colonies on the agar plates, thus leading to plate count anomalies (6, 7). To  
67 overcome the limitations, much effort has been devoted to developing alternative approaches,  
68 including physically separating cells to decrease competition or inhibitors (8-10), using

69 modification to prepare agar media, using alternative gelling agents or antioxidants to  
70 minimize unfavorable compounds (11-13), and adding signal molecules or cocultivating with  
71 recruiter organisms to better reflect the natural environment (14-16). Nevertheless, most  
72 postulated extant microbes in nature remain uncultivated; thus, other essential factors for  
73 microbial cultivation that exist in nature are likely absent from those artificial conditions.

74 One simple solution for approaching the unknown growth factors is to incubate the  
75 microbes in their natural environment. Applying this idea to microbial cultivation led to  
76 developing *in situ* cultivation methods aiming to better simulate the natural environment (for  
77 a review, see Epstein et al., 2010 [17]). Several *in situ* cultivation methods with similar basic  
78 concepts have been applied to various environments, including sediment, activated sludge,  
79 alkaline soda lakes, sponges, soil, and a hot spring environment, and have been demonstrated  
80 to be highly capable of microbial cultivation (18-24). However, why these *in situ* cultivation  
81 techniques enable cultivating previously uncultivated microbes that are otherwise difficult or  
82 impossible to grow using conventional methods remains unclear. Answering this question  
83 would provide a key factor for microbial cultivation and contribute to developing additional  
84 advanced cultivation techniques.

85 In the present work, we applied *in situ* cultivation to the marine sponge to isolate  
86 previously uncultivated microbial species. Marine sponges are rich sources of bioactive  
87 secondary metabolites of biotechnological interest for their antiviral, antitumoral,  
88 antimicrobial and cytotoxic properties (25-27). It has been suggested that symbiotic microbes  
89 in marine sponges produces some of these bioactive metabolites (28-32). Additionally,  
90 recently developed culture-independent approaches have provided molecular evidence of  
91 these microorganisms' functional roles (33-35). However, most of these producers remain  
92 unexplored and unavailable because the microbes associated with the sponges cannot be

93 easily cultivated (32).

94 One focus of the present study was to determine an effective cultivation method to  
95 broaden the accessible marine sponge-associated microbes. To do this, we employed one of *in*  
96 *situ* cultivation method, diffusion chamber to isolate previously uncultivated marine sponge-  
97 associated microbes and comparatively analyzed this method's efficiencies with those of the  
98 conventional method (direct agar plating). Although the applicability of *in situ* cultivation to  
99 marine (22) and freshwater sponges (21) has been demonstrated in previous studies, this  
100 approach's potential for cultivating novel, previously uncultivated microbial species from  
101 sponge samples remains unknown.

102 Another aim of the study is clarifying the reason why *in situ* cultivation enables growing  
103 previously uncultivated microbes that cannot be isolated by conventional methods. We  
104 hypothesized that inactive or nongrowing microbial cells are stimulated and aroused to begin  
105 regrowing during *in situ* incubation by a growth initiation factor from the outside  
106 environment and enriched inside an *in situ* cultivation chamber with nutrients. This brings  
107 different microbial groups, which mostly resist cultivation by conventional methods, to the  
108 culture collection. To verify our hypothesis, recovery from the nongrowing state in response  
109 to the marine sponge extract was comparatively analyzed between microbes isolated via *in*  
110 *situ* cultivation and those isolated via the conventional method.

111

## 112 **Results**

### 113 **Identifying isolates based on the 16S rRNA gene.**

114 Figures 1 presents the overall experimental design for the cultivation experiments (Fig. 1a),

115 structure and application of the device (DC) (Fig. 1b and c), and principle of *in situ*  
116 cultivation method (Fig. 1d). One hundred twenty bacterial isolates (60 per cultivation  
117 method) were randomly selected and identified. *In situ* cultivation (DC) enabled isolating 37  
118 species (defined as operational taxonomic units [OTUs] composed of 16S rRNA gene  
119 sequences sharing over 97% identity) from six taxonomic groups (*Actinobacteria*,  
120 *Bacteroidetes*, *Firmicutes*, *Alphaproteobacteria*, *Epsilonproteobacteria* and  
121 *Gammaproteobacteria*) (Fig. 2, Table S1). Standard direct plating (SDP) cultivation enabled  
122 isolating 13 species from three taxonomic groups (*Bacteroidetes*, *Alphaproteobacteria* and  
123 *Gammaproteobacteria*) (Table S2). These results suggested that *in situ* cultivation (DC)  
124 yielded significantly higher diversity among the isolates at the species level than among those  
125 obtained via SDP cultivation (Fig. 2). In addition, a few species overlapped among the  
126 isolates from each method (Fig. 2). One species belonging to *Ruegeria atlantica* (99%  
127 similarity to the closest known species) was shared between the DC and SDP isolates.

128 **Suggested location for Fig. 1 and Fig. 2**

129 The ratios of novel species, defined as a strain with  $\leq 97\%$  16S rRNA similarity to the  
130 closest known relative among the isolates, differed between the SDP and *in situ* cultivation  
131 methods. Only one SDP isolate (1.7%) was a novel species, while 40% (24 isolates belonging  
132 to 12 species) of the *in situ* isolates was novel species (Fig. 2, 3).

133 **Suggested location for Fig. 3**

134 **Microbial community compositions among the samples: comparison of the culture-**  
135 **dependent and -independent methods.**

136 The microbial community compositions of the marine sponge (*Theonella swinhoei*) samples  
137 were analyzed by Illumine-MiSeq sequencing based on the 16S rRNA gene. A total of

138 114,624 reads with a median length of 252 base pairs (bp) (V4~533–786 bp) assigned to 1625  
139 OTUs were obtained from the sample. Ten major taxonomic groups were detected (mostly at  
140 the phylum level but at the class level for Proteobacteria): *Acidobacteria*, *Actinobacteria*,  
141 *Bacteroidetes*, *Chloroflexi*, *Gemmatimonadetes*, *Poribacteria*, *Alphaproteobacteria*,  
142 *Epsilonproteobacteria*, *Gammaproteobacteria* and SBR1093 (with a cut-off of <1.0%; Fig. 4).  
143 The *in situ* isolates belonged to six groups, *Actinobacteria*, *Bacteroidetes*, *Firmicutes*,  
144 *Alphaproteobacteria*, *Epsilonproteobacteria* and *Gammaproteobacteria*, while the SDP  
145 isolates belonged to three groups: *Bacteroidetes*, *Alphaproteobacteria* and  
146 *Gammaproteobacteria*.

147 **Suggested location for Fig. 4**

#### 148 **Effect of the sponge extract on starvation recovery.**

149 For further investigation, we picked 28 and 11 strains obtained from *in situ* and SDP  
150 cultivation, respectively, which are representing identical species of all identified isolates  
151 except a few lost species (we hereafter define those selected stains as *in situ* and SDP strains,  
152 respectively). Figure 5a shows the effect of adding the sponge extract (0.1% of the total  
153 volume) to the medium on starvation recovery (colony formation efficiency). Each strain's  
154 colony efficiency ratio between the two culture conditions (with and without the sponge  
155 extract) was calculated. Adding the sponge extract to the medium exerted different effects on  
156 the recoveries between the *in situ* and SDP strains. Adding the sponge extract positively  
157 affected the recoveries of all tested *in situ* strains. Among them, 11 strains (11/28, 39%) more  
158 than doubled in colony numbers on the agar media with the sponge extract compared with  
159 that on the media with no sponge extract. In contrast, none of SDP strains was not positively  
160 affected or rather negatively affected on the recovery by the sponge extract addition, except

161 two strains were slightly positively affected (Fig. 5a). Note that closest species of one SDP  
162 strain (SDP8) showed positive is *Ruegeria atlantica*, which is commonly found in *in situ*  
163 isolates (Table S1 and S2).

164

### 165 **Effect of the sponge extract on specific growth rates and carrying capacities.**

166 Figure 5b and c shows the effect of adding the sponge extract (0.1% of the total volume) to  
167 the medium on the specific growth rate and carrying capacity, respectively. Each strain's  
168 specific growth rate and carrying capacity were measured and compared under two medium  
169 conditions (with and without the sponge extract) to examine the sponge extract's effect on  
170 growth activity (Fig. S1). In contrast to its effect on starvation recovery (colony forming  
171 efficiencies), adding the sponge extract to the medium did not significantly elevate or  
172 decrease both the specific growth rate and carrying capacity of any tested strain. The addition  
173 slightly negatively affected the specific growth rates for more than half the tested *in situ*  
174 strains (15/28, 54%) and all SDP strains except SDP7 and SDP8 (SDP8 is commonly isolated  
175 species from *in situ* cultivation).

176 **Suggested location for Fig. 5**

## 177 **Discussion**

### 178 **Effectiveness of *in situ* cultivation techniques for isolating novel species from marine** 179 **sponges.**

180 Marine sponges are sources of many bioactive natural products (36-38), which are often  
181 produced by host-specific microbes that are mostly unknown because of their uncultivability  
182 (32, 39). Molecular surveys have shown that sponges host rich microbial communities (40,



183 41); however, only a minor component of this richness has been cultivated via the  
184 conventional cultivation method (32). Extensive cultivation efforts have made use of several  
185 alternative techniques to isolate previously uncultured sponge-associated bacteria, including  
186 adding the sponge extracts or its skeleton to the media (42, 43), using oligotrophic media (36),  
187 adding antibiotics to inhibit fast-growing bacteria (44), using alternative gelling agent (45),  
188 and using *in situ* diffusion devices (21, 22) and floating filters (42). These alternative  
189 approaches yielded an increased novelty of sponge isolates and improved cultivability rates  
190 up to 14% in some cases (42). However, most postulated extant microbes in sponges remain  
191 uncultivated; thus, further efforts to discover such novel microbes are needed. Here, we  
192 isolated previously uncultivated microorganisms from marine sponges more efficiently than  
193 in previous studies (40% of *in situ* isolates were novel species in this study). Newly  
194 discovered microbes are candidates as sources for valuable secondary metabolites, and the  
195 newly established approach would be a strong tool for further accessing untapped microbial  
196 resources.

197

198 **Hypothesis: a key mechanism of *in situ* cultivation for growing previously uncultivated**  
199 **microbial types.**

200 *In situ* cultivation approach via diffusion chamber (DC) enabled obtaining a different culture  
201 collection that was larger and more novel than that obtained by standard direct plating (SDP)  
202 (Fig. 2, 3). Only one species was common in culture collections between the *in situ* and SDP  
203 cultivation methods. These results indicated that most isolated species were unique to their  
204 isolation approach, and *in situ* cultivation enabled cultivating specific microbial types that  
205 have rarely been isolated by conventional cultivation approaches.

206 These results raised the question, “what mechanism from the alternative approach yielded  
207 these previously uncultivated microbial groups that differed entirely from the standard  
208 cultivation approach?”. A simple explanation is that during *in situ* cultivation, inoculated  
209 microbes receive unknown growth components from the natural environment necessary for  
210 their growth but absent from the artificial medium (46). However, the present study found  
211 that isolates unique to *in situ* cultivation grew stably under the same conditions as those of the  
212 SDP cultivation at the subcultivation step, which lacks such growth components. This  
213 phenomenon also occurred in previous studies that used *in situ* cultivation (18, 20, 21, 24).  
214 The only the difference between the *in situ* and SDP cultivation methods in the experimental  
215 procedure was whether a one-week incubation was performed in the natural environment  
216 (inside the marine sponge in this study) prior to agar plate cultivation (Fig. 1, a). We then  
217 explored what mechanism could explain this observation.

218 We hypothesized that 1) most environmental microbes (in this case, microbes associated  
219 with marine sponges) are in nongrowing states (viable but nonculturable [VBNC], dormancy,  
220 near-zero growth, inactive state) to survive under nutrient-limited conditions (47), and 2) they  
221 require a specific signaling-like compounds, so called growth initiation factor to recover from  
222 the nongrowing state and begin regrowth together with nutrient (here, it is supplied by  
223 medium in diffusion chamber). Such growth initiation factor exists in natural environments  
224 but is usually absent from artificial media. We expected that this factor stimulated and  
225 aroused inactive microbial cells (in a nongrowing state), resulting in the growth of specific  
226 microbial groups that could not be isolated via standard cultivation (Fig. 6). However,  
227 although considered essential for microbial cultivation, the microbial awakening mechanism  
228 remains unclear (48).

229 **Suggested location for Fig. 6**

230 **Growth triggering by growth initiation factor in nature.**

231 To verify the hypothesis and clarify the mechanism behind the *in situ* cultivation results, the  
232 effect of adding small amounts of the sponge extract on the starvation recoveries and specific  
233 growth rates of representative isolates (from every species) were compared between the  
234 strains derived from *in situ* and SDP cultivation. Most species (represented isolates) from the  
235 *in situ* and SDP cultivations were used for the test, except a few strains which had been lost.

236 The results supported the hypothesis as follows. Adding the sponge extract to the medium  
237 (only 0.1% of the total volume) elevated the colony formation efficiencies of all tested *in situ*  
238 strains at the starvation recovery step, while it only negatively affected that of the SDP strains  
239 (Fig. 5a). In contrast, adding the sponge extract did not elevate the specific growth rates in  
240 either the *in situ* or SDP strains but rather slightly suppressed them, especially the SDP strains  
241 (Fig. 5b). In addition, adding the sponge extract did not positively affect the carrying capacity  
242 of every tested strain (Fig. 5c). These results show that 1) the sponge extract contains a  
243 growth initiation factor that facilitate starvation recovery, and these substances selectively  
244 worked on the *in situ* strains, and 2) the growth initiation factor in the sponge extract did not  
245 continuously promote growth activity but worked as triggers for regrowth, which was likely  
246 resuscitation from dormancy (nongrowing state).

247 Therefore, during the *in situ* cultivation, such signaling-like compounds, defined as  
248 “growth initiation factor”, was provided from the natural environment (i.e., the marine  
249 sponge), while nutrients were provided inside the chamber from the beginning. These factors  
250 enabled microbes begin to growing again and finally become enriched inside the chamber  
251 (Fig. 6b). In contrast, standard agar plate medium lacks such growth initiation factor; thus,  
252 significant numbers of inoculated microbial cells did not resuscitate from dormancy and thus

253 did not form colonies (Fig. 6c, upper part). Because sponge-associated microbes produce  
254 various chemical compounds, such growth initiation factor are likely also produced by  
255 specific microbes associated with the sponge (32).

256 In contrast, because SDP strains require no growth initiation factor to begin regrowing,  
257 these strains are frequently isolated via conventional approaches (the SDP method in the  
258 present study) and have been discovered in previous studies. Therefore, microbial types in  
259 isolates differ completely between methods, and the novelty and diversity of isolates derived  
260 from *in situ* cultivation are higher than are those derived from the conventional approach.

261 Additionally, the sponge extract was highly toxic to the microbes. Adding the sponge  
262 extract to the media at higher concentrations than that of the original test condition (e.g., 1%,  
263 which was 10 times higher than the original test condition) strongly inhibited isolate growth  
264 (data not shown). This was likely due to antimicrobial substances in the sponge, such as  
265 secondary antimetabolites or high concentrations of toxic trace elements, which can  
266 accumulate in the sponge body (43, 49, 50). Furthermore, SDP strains are more sensitive to  
267 that toxicity than are *in situ* strains as described above and shown in Fig. 5. In other words,  
268 under the tested condition (0.1%), the negative effect of adding the sponge extract appeared  
269 only for SDP strains. This suggests that microbial types that are susceptible to being enriched  
270 by *in situ* cultivation are less sensitive to the toxic substances that are likely to be excreted  
271 from the sponge in nature; thus, microbial types derived from *in situ* cultivation would be  
272 more competitive in the original environment (inside the sponge). We reported a similar  
273 observation in our previous study, suggesting that *in situ* isolates are more competitive under  
274 their original conditions (natural environment) than are SDP isolates (23). Therefore, *in situ*  
275 isolates might outcompete the microbes that are frequently isolated via SDP cultivation. This  
276 might be another reason why *in situ* isolates are novel and differ phylogenetically from SDP

277 isolates.

278

279 **Significance of the present study relative to solving microbial uncultivability.**

280 Various *in situ* cultivation methods with similar basic rationales have been applied to various  
281 environmental samples and have been shown to be highly capable of microbial cultivation  
282 compared with conventional approaches because the method led to isolating some  
283 uncultivated and phylogenetically new and industrially important isolates (18-21, 51-53).  
284 Furthermore, mining “microbial dark matter” using this new approach remains highly  
285 expected (2). However, no study has clarified the growth facilitation mechanism of *in situ*  
286 cultivation or the reason why *in situ* cultivation yields more phylogenetically novel and  
287 diverse microbial types than does the conventional method. This has limited further  
288 advancing the method regardless of its potential. The present study resolved this issue for the  
289 first time.

290 Furthermore, the discovery in the present study, especially regarding microbial  
291 resuscitation from a nongrowing state in response to the growth initiation factor gives us an  
292 important clue toward solving this challenging issue of why most environmental microbes  
293 cannot grow on standard media. This has been described as "the great plate count anomaly"  
294 (6, 7). Although most microbial types that resist cultivation are assumed to be fastidious and  
295 require culture conditions within a narrow range, the results of the present study suggest that  
296 microbial uncultivability cannot simply be explained by the unfitness of the specific strain to  
297 certain culture conditions such as medium composition, gas composition, temperature, and  
298 pH (54).

299 Several studies have been conducted to determine the reasons for microbial

300 uncultivability, such as inoculum size (55) and phosphate-catalyzed hydrogen peroxide  
301 formation from agar (12, 13, 56). A few attempts have been made to discover microbial  
302 interactions via signaling molecules that promote the growth of specific microbial types.  
303 Short peptides (57), siderophores (58) and quinones (59) have been identified as growth-  
304 promoting factors for microbial types that cannot grow independently.

305       However, the causes of the uncultivability and the mechanism facilitating growth of  
306 previously uncultivated microbes shown in the present study differ from those reported in  
307 previous studies in several aspects as follows. First, no study has focused on growth  
308 triggering or distinguished this from simple growth promoting, yet that must be the key to  
309 solving the microbial uncultivability as shown herein. Second, no study has provided  
310 experimental evidence showing that the growth of diverse environmental microbes is  
311 controlled by a growth initiation factor.

312       Previous studies have reported various types of microbial nongrowing states such as  
313 viable but nonculturable (VBNC), near-zero growth (NZG) and dormancy (60-62), which are  
314 suspected to cause microbial uncultivability. Wide species distributions in the VBNC state  
315 have been detected in broad environments such as sediment (63), estuarine water (64),  
316 seawater (65) and soil (66). The broad distribution of inactive microbial cells in environments  
317 reinforce that this state is a common mechanism for coping with unfavorable environmental  
318 conditions (60, 62). Although microbial resuscitation from dormancy remains unclear, a few  
319 studies on resuscitation or germination of gram-positive bacteria via signaling compounds  
320 have been reported (67-69). Therefore, many environmental microorganisms may possess  
321 similar systems for microbial awakening from nongrowing states via signaling compounds.  
322 Furthermore, the “scout hypothesis” theory has been proposed, which states that 1) dormant  
323 microbes stochastically and spontaneously awaken, and 2) awakened cells trigger the

324 awakening of other dormant cells (70, 71). However, no study has experimentally confirmed  
325 that growth triggering of environmental microbes from a nongrowing state is a key  
326 phenomenon of microbial cultivation.

327

### 328 **Concluding remarks and perspectives.**

329 We demonstrated that *in situ* cultivation effectively isolates previously uncultivated microbial  
330 types from the marine sponge. We further clarified that *in situ* cultivation facilitates isolating  
331 novel and different microorganisms compared with the conventional approach because of the  
332 discovery of the growth-triggering phenomenon from a nongrowing state by growth initiation  
333 factor in the natural environment. To our knowledge, the present study shows the first  
334 evidence that 1) triggering growth is a key for cultivating previously uncultivated microbes,  
335 and 2) the growth initiation factor (signaling-like compounds) in natural environments (likely  
336 produced by microbes) stimulate microbial resuscitation from a nongrowing state.

337 Next challenge beyond the present study include 1) identifying the growth initiation  
338 factor via natural chemical approaches and 2) clarifying the donors and accepters of signaling  
339 compounds (i.e., who produces what and to whom). This will provide a new insight into  
340 microorganisms previously considered uncultivable and the complex networking system for  
341 controlling growth among microbes in nature.

342

### 343 **Materials and Methods**

#### 344 **Sample collection.**

345 Marine sponge (*Theonella swinhoei*) specimens were collected while scuba diving at 15-20 m

346 depth by hand in August 2015, near Okino island, Kochi prefecture, Japan. Sponges were  
347 kept in a cooling box with seawater and transported to the aquarium and laboratory for  
348 further experiments.

349

### 350 **Media.**

351 For the microbial cultivation experiments, we used the following four media: 1) 1:10 diluted  
352 Reasoner's 2A (R2A) media (10% of the manufacturer's suggested concentration, Nihon  
353 Seiyaku, Japan); 2) marine media (Difco, Franklin Lakes, NJ, USA); 3) fish extract media  
354 (0.2 g fish extract and 0.1 g yeast extract per liter); and 4) sponge extract media (0.01 g  
355 peptone and 40 ml aqueous sponge extract per liter). The sponge extract was prepared by  
356 mixing homogenized sponge and sterile distilled water including 3.5% artificial sea salt at a  
357 1:1 (vol/vol) ratio, then vortexing for 1 min, spinning down (10 min, 8,000 rpm), and filter  
358 sterilization using a 0.2- $\mu$ m pore-size filter. All media contained 1.5% agar to produce solid  
359 medium, and all media except the marine media were supplemented with 3.5% artificial sea  
360 salt, SEALIFE (Marine Tech, Tokyo, Japan). Colonies grown on these media were  
361 subcultured for purification on 1.5% agar plates supplemented with 1:10 R2A broth. All  
362 isolates grew well on 1:10 diluted R2A agar media. Some isolates were derived from  
363 different media at the subcultivation or direct plating steps.

364

### 365 **Diffusion chamber *in situ* cultivation.**

366 Diffusion chamber (DC) *in situ* cultivation method was performed to isolate marine-sponge  
367 associated microbes. The DC was prepared as described previously (18). The DC is an *in situ*



368 cultivation device that allows exchanging chemical compounds, thereby simulating a natural  
369 environment (Fig. 1. d). To produce a chamber, a 0.1- $\mu\text{m}$  pore-size filter polycarbonate  
370 membrane (Millipore, Darmstadt, Germany) was glued to a rectangular-shaped silicone flame  
371 ( $w = 3 \text{ cm} \times 1.2 \text{ cm}$ ,  $d = 0.3 \text{ cm}$ ) with a waterproof adhesive (Cemedain, Tokyo, Japan) (Fig.  
372 1. b). To prepare the marine sponge sample inoculum, 20 g of the subsample was rinsed  
373 three times with sterile artificial sea water and pulverized using a sterile mortar and pestle  
374 with the same volume of sterile artificial sea water. The aliquots were diluted  $10^{-4}$  to  $10^{-5}$   
375 with sterilized water including 3.5% artificial sea salt and mixed with warm ( $45^{\circ}\text{C}$ ) agar with  
376 1:10 diluted R2A. The mix was placed on the chamber membrane, and the second membrane  
377 was glued to the other side of the silicone flame, sealing the agar inside to form a chamber.

378 For *in situ* cultivation, the sponges were kept in aquariums in the Takehara station of  
379 Hiroshima University in Takehara-city, Japan. The aquarium was a cylindrical container with  
380 a holding capacity of ca. 43.3 L ( $\text{Ø} = 0.35 \text{ m}$ ,  $d = 0.45 \text{ m}$ ), and seawater was supplied  
381 continuously. To install the DC into the sponge, similar sized grooves as those of the device  
382 were made on the specimen's surface by cutting with a scalpel blade, and four DCs were  
383 inserted (Fig. 1. c). After one week of *in situ* incubation, DCs were retrieved from the  
384 sponges and then transported to the laboratory. The agar material from each device was added  
385 to 1 ml of sterilized water including 3.5% artificial sea salt, homogenized with a sterile stick,  
386 vortexed, diluted with sterile water including 3.5% artificial sea salt, subcultured on media as  
387 described above with 1.5% agar, and incubated at  $20^{\circ}\text{C}$ . After one week, 60 colonies were  
388 randomly selected, pure cultured using 1:10 R2A medium and used for further analysis.

389

390 **Standard direct plating cultivation.**

391 Conventional standard direct plating (SDP) was performed to compare the SDP results with  
392 those of the *in situ* cultivation approaches (Fig. 1). Aliquots from sponge samples prepared in  
393 the same manner as the DC cultivation were diluted serially and plated directly on the agar  
394 media described above. After incubating for one-week at 20°C, 60 colonies were randomly  
395 selected and pure-cultured using 1:10 R2A medium for microbial identification.

396

### 397 **Identification of isolates based on 16S rRNA gene sequencing.**

398 Taxonomies were identified via sequencing 610- to 712-bp fragments of the 16S rRNA gene.  
399 The colony material was used directly as a PCR template. The 16S rRNA gene was amplified  
400 using the universal primers, 27F (5'-AGAGTTTGATCCTGGCTCAG-3') and 1492R (5'-  
401 GGTTACCTTGTACGACTT-3'), with a KOD FX Neo system (Toyobo, Osaka, Japan),  
402 then purified using a fast gene purification kit (Nippon Genetics, Tokyo, Japan). The purified  
403 PCR products were sequenced with a commercial sequencer (Takara Bio, Shiga, Japan) by  
404 fluorescent dye terminator sequencing. The sequences were compared with those available in  
405 GenBank ([www.ncbi.nlm.nih.gov](http://www.ncbi.nlm.nih.gov)) using Molecular Evolutionary Genetics Analysis (MEGA  
406 software, Tempe, AZ, USA) to determine their closest relatives. Distance matrices and  
407 phylogenetic trees based on 16S rRNA sequences were calculated among the isolated OTUs  
408 (defined at 97% 16S rRNA gene sequence identity) according to the Kimura two-parameter  
409 model and neighbor-joining algorithms using the MEGA program (MEGA software, Tempe,  
410 AZ, USA). One thousand fast bootstraps were performed to assign confidence levels to the  
411 nodes in the trees.

412

### 413 **DNA extraction and amplicon sequencing targeting the 16S rRNA gene.**

414 To compare the cultivated bacterial diversity with the microbial molecular signatures in the  
415 host sponge, 16S amplicon sequencing was performed based on the 16S rRNA genes. After  
416 transferring the marine sponges to the laboratory, samples were washed three times with  
417 DNA-free water and homogenized. Genomic DNA from the homogenized tissue was  
418 extracted using a FastDNA spin kit for soil (MP Biomedicals, Irvine, CA, USA) per the  
419 manufacturer's guidelines. The extracted genomic DNA was amplified using the amplicon  
420 forward primer and amplicon reverse primer with a Hifi hot start ready mix PCR (Kapa  
421 Biosystems, Wilmington, MA, USA), then purified using a fast gene purification kit (Nippon  
422 Genetics, Tokyo, Japan). DNA was sequenced by Hokkaido System Science (Sapporo, Japan)  
423 using an Illumina MiSeq System (Illumina, San Diego, CA, USA). Each read was assigned  
424 taxonomically using Quantitative Insights Into Microbial Ecology (QIIME) software (72).

425

#### 426 **Effect of the sponge extract on starvation recovery.**

427 The colony formation efficiency ratios between the two culture conditions (media with and  
428 without the sponge extract) were calculated for each tested strain to examine the effect of the  
429 sponge extract on starvation recovery. First, one strain per OTU (defined at 97% 16S rRNA  
430 gene sequence identity) from the DC and SDP cultivations were selected and cultured in 5 ml  
431 of 1:10 diluted R2A broth with 3.5% artificial sea salt at 20°C (liquid cultures). Each culture  
432 was diluted 100 times and placed at 5°C to inactivate them. After 3 days, the liquid culture  
433 serial dilutions were inoculated in triplicate on two types of agar media: 1:10-diluted R2A  
434 agar medium with 0.1% (vol/vol) of the sponge extract and the same medium without the  
435 sponge extract. The sponge extract added to the medium before autoclaving. After 5 days of  
436 incubation at 20°C, the colony number ratios between the two culture conditions (with and

437 without the sponge extract) were measured for each tested strain.

438

439 **Effect of the sponge extract on the specific growth rate and carrying capacity.**

440 Specific growth rates and carrying capacities under the two culture conditions (medium with  
441 and without the sponge extract) were measured and compared for each tested strain to  
442 examine the sponge extract's effect on the growth activity. First, one strain per each OTU  
443 from the DC and SDP cultivations were selected and cultured (liquid cultures) in the same  
444 manner as described above. Next, 5–20  $\mu$ l of the microbial cell suspension from each liquid  
445 culture was inoculated in triplicate into the two media (1:10-diluted R2A medium with 0.1%  
446 [vol/vol] of the sponge extract and the same medium without the sponge extract). The sponge  
447 extract added to the medium before autoclaving. The cultures were then incubated at 20°C  
448 with shaking at 150 rpm. The optical density (OD) was measured at 600 nm using a  
449 spectrophotometer (DR 3900, HACH, Metropolitan, MD, USA). The growth curve for the  
450 OD 600 value was fitted using the nonlinear regression function with a logistic model in  
451 Sigma plot software (San Jose, CA, USA, Systat Software, Inc.). Specific growth rates, as  
452 maximum rates of change, were determined to  $\mu$  by the change in OD 600 on a logarithmic  
453 scale as time. The ratio of the specific growth rate ( $\mu$ ) between the values measured under the  
454 two culture conditions (with and without the sponge extract) was calculated for each tested  
455 strain. The carrying capacity (maximum growth) was determined by its maximum value on  
456 the fitted growth curve.

457

458 **Data availability.**

459 Newly determined sequence data have been deposited in GenBank ([www.ncbi.nlm.nih.gov](http://www.ncbi.nlm.nih.gov))  
460 under accession numbers MK672856 to MK672868 for isolates from diffusion chamber, and  
461 MK674856 to MK674892 for isolates from standard direct plate cultivation.

462

## 463 **Acknowledgment**

464 This work was supported by JSPS KAKENHI Grant Numbers JP17F17098, JP25630383,  
465 JP18K19181. D. J is an International Research Fellow of the Japan Society for the Promotion  
466 of Science. We thank Traci Raley, MS, ELS, from Edanz Group for editing a draft of this  
467 manuscript. We thank Slava S. Epstein for valuable comments and discussions on our data.

468

## 469 **References**

- 470 1. Rinke C, Schwientek P, Sczyrba A, Ivanova NN, Anderson IJ, Cheng J, Darling A,  
471 Malfatti S, Swan BK, Gies EA, Dodsworth JA, Hedlund BP, Tsiamis G, Sievert SM, Liu  
472 W, Eisen JA, Hallam SJ, Kyrpides NC, Stepanauskas R, Rubin EM, Hugenholtz P,  
473 Woyke T. 2013. Insights into the phylogeny and coding potential of microbial dark  
474 matter. *Nature* 499: 431-437.
- 475 2. Lok C. 2015. Mining the microbial dark matter. *Nature* 522: 270-273.
- 476 3. Rappé MS, Giovannoni SJ. 2003. The uncultured microbial majority. *Annu Rev*  
477 *Microbiol* 57: 369-394.
- 478 4. Handelsman J. 2004. Metagenomics: application of genomics to uncultured  
479 microorganisms. *Microbiol Mol Biol Rev* 68: 669-685.

- 480 5. Keller M, Zengler K. 2004. Tapping into microbial diversity. *Nat Rev Microbiol* 2: 141-  
481 150.
- 482 6. Staley JT, Konopka A. 1985. Measurement of in situ activities of nonphotosynthetic  
483 microorganisms in aquatic and terrestrial habitats. *Annu Rev Microbiol* 39: 321-346.
- 484 7. Amann RI, Ludwig W, Schleifer KH. 1995. Phylogenetic identification and in situ  
485 detection of individual microbial cells without cultivation. *Microbiol Rev* 59:143-169.
- 486 8. Cannon SA, Giovannoni SJ. 2002. High-throughput methods for culturing  
487 microorganisms in very-low-nutrient media yield diverse new marine isolates. *Appl*  
488 *Environ Microbiol* 68: 3878-3885.
- 489 9. Zengler K, Toledo G, Rappé M, Elkins J, Mathur EJ, Short JM, Keller M. 2002.  
490 Cultivating the uncultured. *Proc Natl Acad Sci U S A* 99: 15681-15686.
- 491 10. Tandogan N, Abadian PN, Epstein S, Aoi Y, Goluch ED. 2014. Isolation of  
492 microorganisms using sub-micrometer constrictions. *PLoS One* 9: e101429.
- 493 11. Tamaki H, Sekiguchi Y, Hanada S, Nakamura K, Nomura N, Matsumura M, Kamagata Y.  
494 2005. Comparative analysis of bacterial diversity in freshwater sediment of a shallow  
495 eutrophic lake by molecular and improved cultivation-based techniques. *Appl Environ*  
496 *Microbiol* 71: 2162-2169.
- 497 12. Tanaka T, Kawasaki K, Daimon S, Kitagawa W, Yamamoto K, Tamaki H, Tanaka M,  
498 Nakatsu CH, Kamagata Y. 2014. A hidden pitfall in the preparation of agar media  
499 undermines microorganism cultivability. *Appl Environ Microbiol* 80: 7659-7666.
- 500 13. Kato S, Yamagishi A, Daimon S, Kawasaki K, Tamaki H, Kitagawa W, Abe A, Tanaka M,  
501 Sone T, Asano K, Kamagata Y. 2018. Isolation of previously uncultured slow-growing

- 502 bacteria by using a simple modification in the preparation of agar media. *Appl Environ*  
503 *Microbiol* 84: e00807-18.
- 504 14. Bruns A, Cypionka H, Overmann J. 2002. Cyclic AMP and acyl homoserine lactones  
505 increase the cultivation efficiency of heterotrophic bacteria from the central Baltic sea.  
506 *Appl Environ Microbiol* 68: 3978-3987.
- 507 15. Vartoukian SR, Adamowska A, Lawlor M, Moazzez R, Dewhirst FE, Wade WG. 2016. In  
508 vitro cultivation of "Unculturable" oral bacteria, facilitated by community culture and  
509 media supplementation with siderophores. *PLoS One* 11: e0146926.
- 510 16. Tanaka Y, Tamaki H, Tanaka K, Tozawa E, Matsuzawa H, Toyama T, Kamagata Y, Mori  
511 K. 2018. "Duckweed-microbe co-cultivation method" for isolating a wide variety of  
512 microbes including taxonomically novel microbes. *Microbes Environ* 33: 402-406.
- 513 17. Epstein SS, Lewis K, Nichols D, Gavrish E. 2010. New approaches to microbial isolation,  
514 p 3-12. In Baltz RH, Davies JE, Demain A (ed), *Manual of industrial microbiology and*  
515 *biotechnology*, vol 4. ASM Press, Washington, DC.
- 516 18. Bollmann A, Lewis K, Epstein SS. 2007. Incubation of environmental samples in a  
517 diffusion chamber increases the diversity of recovered isolates. *Appl Environ Microbiol*  
518 73: 6386-6390.
- 519 19. Aoi Y, Kinoshita T, Hata T, Ohta H, Obokata H, Tsuneda S. 2009. Hollow-fiber  
520 membrane chamber as a device for in situ environmental cultivation. *Appl Environ*  
521 *Microbiol* 75: 3826-3833.
- 522 20. Jung D, Seo E, Epstein SS, Joung Y, Yim JH, Lee H, Ahn TS. 2013. A new method for  
523 microbial cultivation and its application to bacterial community analysis in Buus Nuur,

- 524 Mongolia. *Fundam Appl Limnol* 182: 171-181.
- 525 21. Jung D, Seo E, Epstein SS, Joung Y, Han J, Parfenova VV, Belykh OI, Gladkikh AS, Ahn  
526 TS. 2014. Application of a new cultivation technology, I-tip, for studying microbial  
527 diversity in freshwater sponges of Lake Baikal, Russia. *FEMS Microbiol Ecol* 90: 417-  
528 423.
- 529 22. Steinert G, Whitfield S, Taylor MW, Thoms C, Schupp PJ. 2014. Application of diffusion  
530 growth chambers for the cultivation of marine sponge-associated bacteria. *Mar*  
531 *Biotechnol* 16: 594-603.
- 532 23. Jung D, Aoi Y, Epstein SS. 2016. In Situ Cultivation Allows for Recovery of Bacterial  
533 Types Competitive in Their Natural Environment. *Microbes Environ* 31: 456-459.
- 534 24. Jung D, Seo E, Owen JS, Aoi Y, Yong S, Lavrentyeva EV, Ahn, TS. 2018. Application of  
535 the filter plate microbial trap (FPMT), for cultivating thermophilic bacteria from thermal  
536 springs in Barguzin area, eastern Baikal, *Biosci Biotechnol Biochem* 82: 1624-1632.
- 537 25. Koopmans M, Martens D, Wijffels HR. 2009. Towards commercial production of sponge  
538 medicines. *Marine Drugs* 7:787-802.
- 539 26. Mehbub FM, Lei J, Franco C, Zhang W. 2014. Marine sponge derived natural products  
540 between 2001 and 2010: Trends and opportunities for discovery of bioactives. *Mar Drugs*  
541 12: 4539-4577.
- 542 27. Anjum K, Abbas SQ, Shah SAA, Akhter N, Batool S, Hassan SSU. 2016. Marine  
543 Sponges as a Drug Treasure. *Biomol Ther* 24: 347-362.
- 544 28. Brantley SE, Molinski TF, Preston CM, DeLong EF. 1995. Brominated acetylenic fatty  
545 acids from *Xestospongia* sp., a marine spongebacteria association. *Tetrahedron* 51: 7667-



- 546           7672.
- 547   29. Bewley CA, Holland ND, Faulkner DJ. 1996. Two classes of metabolites from *Theonella*  
548       swinhoei are localized in distinct populations of bacterial symbionts. *Experientia* 52:  
549       716-722.
- 550   30. Flatt PM, Gautschi JT, Thacker RW, Musafija-Girt M, Crews P, Gerwick WH. 2005.  
551       Identification of the cellular site of polychlorinated peptide biosynthesis in the marine  
552       sponge *Dysidea* (*Lamellodysidea*) *herbacea* and symbiotic cyanobacterium *Oscillatoria*  
553       *spongelliae* by CARD-FISH analysis. *Mar Biol* 147: 761-774.
- 554   31. König GM, Kehraus S, Seibert SF, Abdel-Lateff A, Müller D. 2006. Natural products  
555       from marine organisms and their associated microbes. *Chembiochem* 7: 229-238.
- 556   32. Wang G. 2006. Diversity and biotechnological potential of the sponge-associated  
557       microbial consortia. *J Ind Microbiol Biotechnol* 33: 545-551.
- 558   33. Fan L, Reynolds D, Liu M, Stark M, Kjelleberg S, Webster NS, Thomas T. 2012.  
559       Functional equivalence and evolutionary convergence in complex communities of  
560       microbial sponge symbionts. *Proc Natl Acad Sci U S A* 109: 1878-1887.
- 561   34. Hentschel U, Piel J, Degnan SM, Taylor MW. 2012. Genomic insights into the marine  
562       sponge microbiome. *Nat Rev Microbiol* 10: 641-654.
- 563   35. Wilson MC, Mori T, Rükert, C., Uria AR, Helf MJ, Takada K, Gernert C, Steffens UAE,  
564       Heycke N, Schmitt S, Rinke C, Helfrich EJM, Brachmann AO, Gurgui C, Wakimoto T,  
565       Kracht M, Crüsemann M, Hentschel U, Abe I, Matsunaga S, Kalinowski J, Takeyama H,  
566       Piel J. 2014. An environmental bacterial taxon with a large and distinct metabolic  
567       repertoire. *Nature* 506: 58-62.

- 568 36. Schmidt EW, Obraztsova AY, Davidson SK, Faulkner DJ, Haygood MG. 2000.  
569 Identification of the antifungal peptide-containing symbiont of the marine sponge  
570 *Theonella swinhoei* as a novel  $\delta$ -proteobacterium, “*Candidatus Enttheonella palauensis*”.  
571 *Mar Biol* 136: 969-977.
- 572 37. Piel J, Hui D, Wen G, Butzke D, Platzer M, Fusetani N, Matsunaga S. 2004. Antitumor  
573 polyketide biosynthesis by an uncultivated bacterial symbiont of the marine sponge  
574 *Theonella swinhoei*. *Proc Natl Acad Sci U S A* 101: 16222-16227.
- 575 38. Hentschel U, Usher KM, Taylor MW. 2006. Marine sponges as microbial fermenters.  
576 *FEMS Microbiol Ecol* 55: 167-177.
- 577 39. Taylor MW, Radax R, Steger D, Wagner M. 2007. Sponge-associated microorganisms:  
578 evolution, ecology, and biotechnological potential. *Microbiol Mol Biol Rev* 71: 295-347.
- 579 40. Schirmer A, Gadkari R, Reeves CD, Ibrahim F, DeLong EF, Hutchinson CR. 2005.  
580 Metagenomic analysis reveals diverse polyketide synthase gene clusters in  
581 microorganisms associated with the marine sponge *Discodermia dissoluta*. *Appl Environ*  
582 *Microbiol* 71: 4840-4849.
- 583 41. Thomas T, Moitinho-Silva L, Lurgi M, Björk JR, Easson C, Astudillo-García C, Olson  
584 JB, Erwin PM, López-Legentil S, Luter H, Chaves-Fonnegra A, Costa R, Schupp PJ,  
585 Steindler L, Erpenbeck D, Gilbert J, Knight R, Ackermann G, Victor Lopez J, Taylor  
586 MW, Thacker RW, Montoya JM, Hentschel U, Webster NS. 2016. Diversity, structure  
587 and convergent evolution of the global sponge microbiome. *Nat Commun* 7: 11870.
- 588 42. Sipkema D, Schippers K, Maalcke WJ, Yang, Y, Salim S, Blanch HW. 2011. Multiple  
589 approaches to enhance the cultivability of bacteria associated with the marine sponge

- 590 Haliclona (gellius) sp. Appl Environ Microbiol 77: 2130-2140.
- 591 43. Keren R, Lavy A, Ilan M. 2016. Increasing the richness of culturable arsenic-tolerant  
592 bacteria from Theonella swinhoei by addition of sponge skeleton to the growth medium.  
593 Microb Ecol 71: 873-886.
- 594 44. Selvin J, Gandhimathi R, Kiran GS, Priya SS, Ravji TR, Hema TA. 2009. Culturable  
595 heterotrophic bacteria from the marine sponge Dendrilla nigra: isolation and  
596 phylogenetic diversity of actinobacteria. Helgol Mar Res 63: 239-247.
- 597 45. Rygaard AM, Thøgersen MS, Nielsen KF, Gram L, Bentzon-Tilia M. 2017. Effects of  
598 gelling agent and extracellular signaling molecules on the culturability of marine bacteria.  
599 Appl Environ Microbiol 83: e00243-17.
- 600 46. Kaeberlein T, Lewis K, Epstein SS. 2002. Isolating "uncultivable" microorganisms in  
601 pure culture in a simulated natural environment. Science 296: 1127-1129.
- 602 47. Jones SE, Lennon JT. 2010. Dormancy contributes to the maintenance of microbial  
603 diversity. Proc Natl Acad Sci U S A 107: 5881-5886.
- 604 48. van Vliet S. 2015. Bacterial dormancy: How to decide when to wake up. Curr Biol 25:  
605 R753-R755.
- 606 49. Hentschel U, Schmid M, Wagner M, Fieseler L, Gernert C, Hacker J. 2001. Isolation and  
607 phylogenetic analysis of bacteria with antimicrobial activities from the Mediterranean  
608 sponges Aplysina aerophoba and Aplysina cavernicola. FEMS Microbiol Ecol 35: 305-  
609 312.
- 610 50. Melander RJ, Liu H, Stephens MD, Bewley CA, Melander C. 2016. Marine sponge  
611 alkaloids as a source of anti-bacterial adjuvants. Bioorg Med Chem Lett 26: 5863-5866.

- 612 51. Sizova MV, Hohmann T, Hazen A, Paster BJ, Halem SR, Murphy CM, Panikov NS,  
613 Epstein SS. 2012. New approaches for isolation of previously uncultivated oral bacteria.  
614 *Appl Environ Microbiol* 78: 194-203.
- 615 52. Ling LL, Schneider T, Peoples AJ, Spoering AL, Engels I, Conlon BP, Mueller A,  
616 Schäberle TF, Hughes DE, Epstein S, Jones M, Lazarides L, Steadman VA, Cohen DR,  
617 Felix CR, Fetterman KA, Millett WP, Nitti AG, Zullo AM, Chen C, Lewis K. 2015. A  
618 new antibiotic kills pathogens without detectable resistance. *Nature* 517: 455.
- 619 53. Berdy B, Spoering AL, Ling LL, Epstein SS. 2017. In situ cultivation of previously  
620 uncultivable microorganisms using the ichip. *Nat Protoc* 12: 2232-2242.
- 621 54. Stewart EJ. 2012. Growing unculturable bacteria. *J Bacteriol* 194: 4151-4160.
- 622 55. Davis KER, Joseph SJ, Janssen PH. 2005. Effects of growth medium, inoculum size, and  
623 incubation time on culturability and isolation of soil bacteria. *Appl Environ Microbiol* 71:  
624 826-834.
- 625 56. Kawasaki K, Kamagata Y. 2017. Phosphate-catalyzed hydrogen peroxide formation from  
626 agar, gellan, and  $\kappa$ -carrageenan and recovery of microbial cultivability via catalase and  
627 pyruvate. *Appl Environ Microbiol* 83: e01366-17.
- 628 57. Nichols D, Lewis K, Orjala J, Mo S, Ortenberg R, O'Connor P, Zhao C, Vouros P,  
629 Kaeberlein T, Epstein SS. 2008. Short peptide induces an "uncultivable" microorganism  
630 to grow in vitro. *Appl Environ Microbiol* 74: 4889-4897.
- 631 58. D'Onofrio A, Crawford JM, Stewart EJ, Witt K, Gavrish E, Epstein S, Clardy J, Lewis K.  
632 2010. Siderophores from neighboring organisms promote the growth of uncultured  
633 bacteria. *Chem Biol* 17: 254-264.

- 634 59. Fenn K, Strandwitz P, Stewart EJ, Dimise E, Rubin S, Gurubacharya S, Clardy J, Lewis  
635 K. 2017. Quinones are growth factors for the human gut microbiota. *Microbiome* 5: 161.
- 636 60. Lennon JT, Jones SE. 2011. Microbial seed banks: the ecological and evolutionary  
637 implications of dormancy. *Nat Rev Microbiol* 9: 119-130.
- 638 61. Panikov NS, Mandalakis M, Dai S, Mulcahy LR, Fowle W, Garrett WS, Karger BL.  
639 2015. Near-zero growth kinetics of *Pseudomonas putida* deduced from proteomic  
640 analysis. *Environ Microbiol* 17: 215-228.
- 641 62. Pinto D, Santos M, Chambel L. 2015. Thirty years of viable but nonculturable state  
642 research: Unsolved molecular mechanisms. *Crit Rev Microbiol* 41: 61-76.
- 643 63. Magarinos B, Romalde JL, Barja JL, Toranzo AE. 1994. Evidence of a dormant but  
644 infective state of the fish pathogen *Pasteurella piscicida* in seawater and sediment. *Appl*  
645 *Environ Microbiol* 60: 180-186.
- 646 64. Oliver JD, Hite F, McDougald D, Andon NL, Simpson LM. 1995. Entry into, and  
647 resuscitation from, the viable but nonculturable state by *Vibrio vulnificus* in an estuarine  
648 environment. *Appl Environ Microbiol* 61: 2624-2630.
- 649 65. Maalej S, Gdoura R, Dukan S, Hammami A, Bouain A. 2004. Maintenance of  
650 pathogenicity during entry into and resuscitation from viable but nonculturable state in  
651 *Aeromonas hydrophila* exposed to natural seawater at low temperature. *J Appl Microbiol*  
652 97: 557-565.
- 653 66. Ben Abdallah F, Lagha R, Bakhrouf A. 2008. Resuscitation and morphological  
654 alterations of *Salmonella bovis* cells under starvation in soil. *World J of*  
655 *Microbiol Biotechnol* 24: 1507-1512.

- 656 67. Mukamolova GV, Murzin AG, Salina EG, Demina GR, Kell DB, Kaprelyants AS, Young  
657 M. 2006. Muralytic activity of *Micrococcus luteus* Rpf and its relationship to  
658 physiological activity in promoting bacterial growth and resuscitation. *Mol Microbiol* 59:  
659 84-98.
- 660 68. Dworkin J, Shah IM. 2010. Exit from dormancy in microbial organisms. *Nat Rev*  
661 *Microbiol* 8: 890-896.
- 662 69. Potgieter M, Bester J, Kell DB, Pretorius E. 2015. The dormant blood microbiome in  
663 chronic, inflammatory diseases. *FEMS Microbiol Rev* 39: 567-591.
- 664 70. Epstein SS. 2009. Microbial awakenings. *Nature* 457: 1083.
- 665 71. Buerger S, Spoering A, Gavrish E, Leslin C, Ling L, Epstein SS. 2012. Microbial scout  
666 hypothesis and microbial discovery. *Appl Environ Microbiol* 78: 3229-3233.
- 667 72. Kuczynski J, Stombaugh J, Walters WA, González A, Caporaso JG, Knight R. 2011.  
668 Using QIIME to analyze 16S rRNA gene sequences from microbial communities. *Curr*  
669 *Protoc Bioinformatics*. Chapter 10: Unit 10.7.

670

671

672

673

674

675

676

677

678

679

680

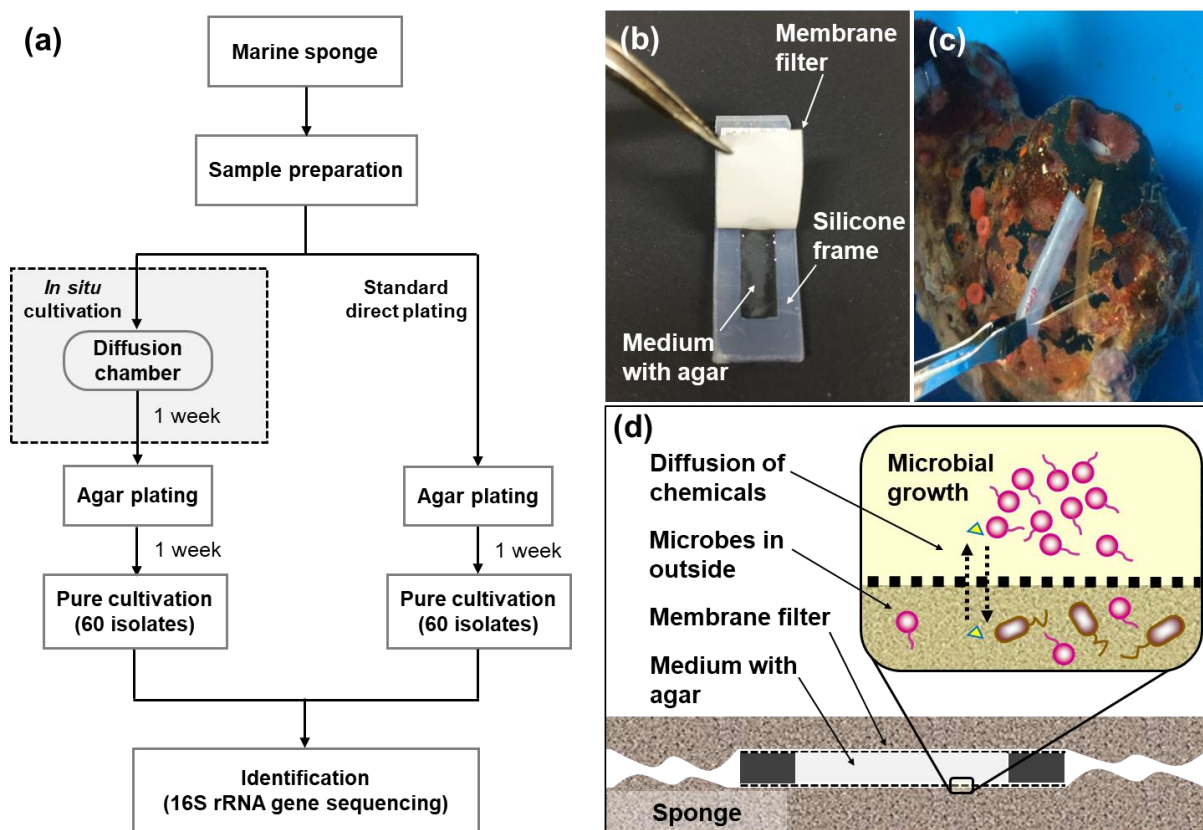

681

682 Figure 1. Flowchart of the experimental steps for microbial cultivation from marine sponges

683 (a) and diffusion chamber (DC) cultivation method applied in the present study: a photo

684 showing structure of the chamber (b), a photo showing installation of DC device into the

685 marine sponge (c), a schematic image showing the principle of DC (d).

686  
687  
688  
689  
690  
691

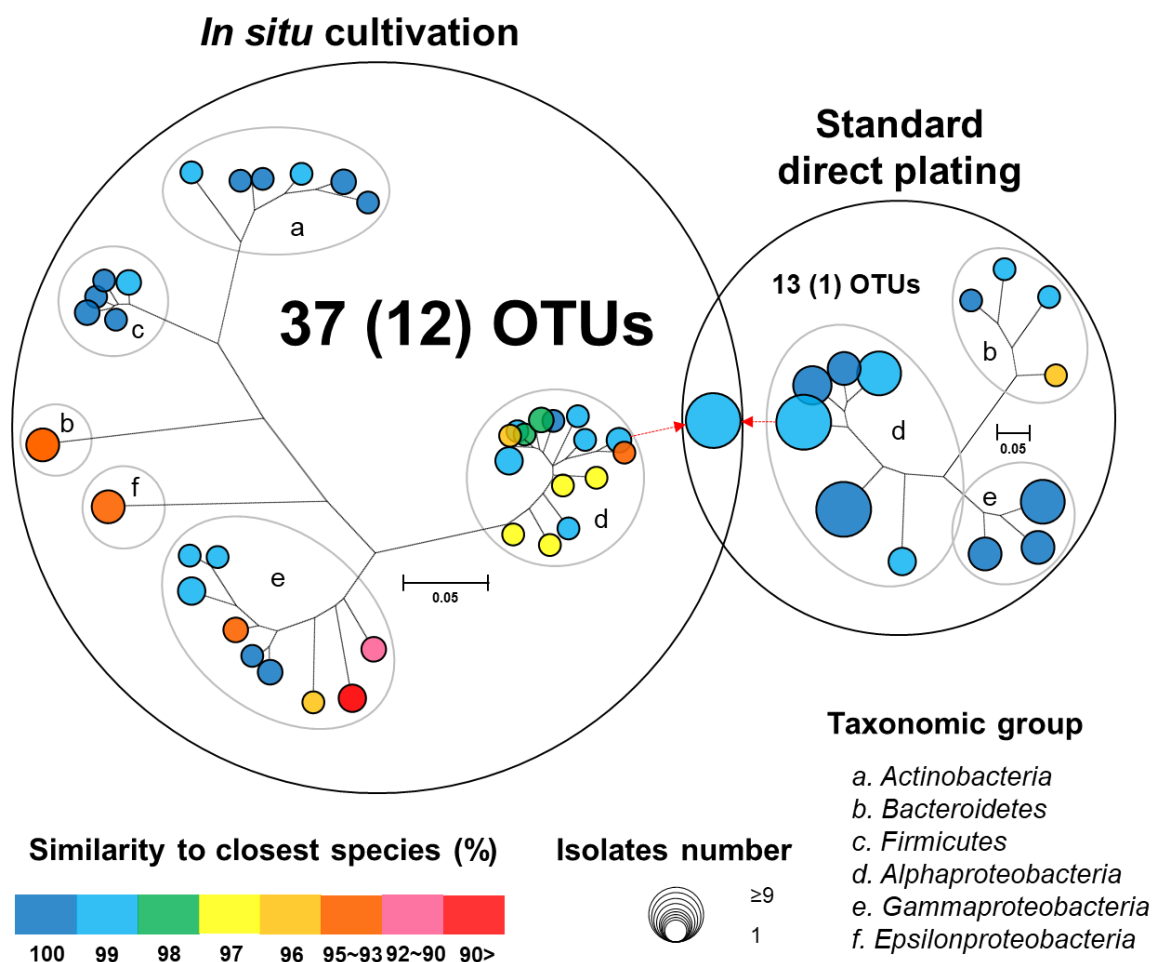

692

693 Figure 2. Venn diagram consisting of phylogenetic trees based on the 16S rRNA gene of  
694 isolates from each cultivation method. The trees are maximum-likelihood trees (fast bootstrap,



695 1,000 replicates). Circle size and color represent the number of OTUs (defined at 97% 16S  
696 rRNA gene sequence identity) and 16S rRNA similarity to the closest known relative in  
697 GenBank, respectively. Represented isolates are also grouped into taxonomic groups (a to f)  
698 at the phylum level (class level for Alpha, Gamma and Epsilon Proteobacteria) by gray  
699 elliptical circles. Circles with pointed arrows indicate species that are overlapped among the  
700 isolates in the different cultivation methods. The numbers in parentheses show the numbers  
701 of novel species. The outer circle area corresponds to the number of isolated OTUs from each  
702 cultivation method.

703

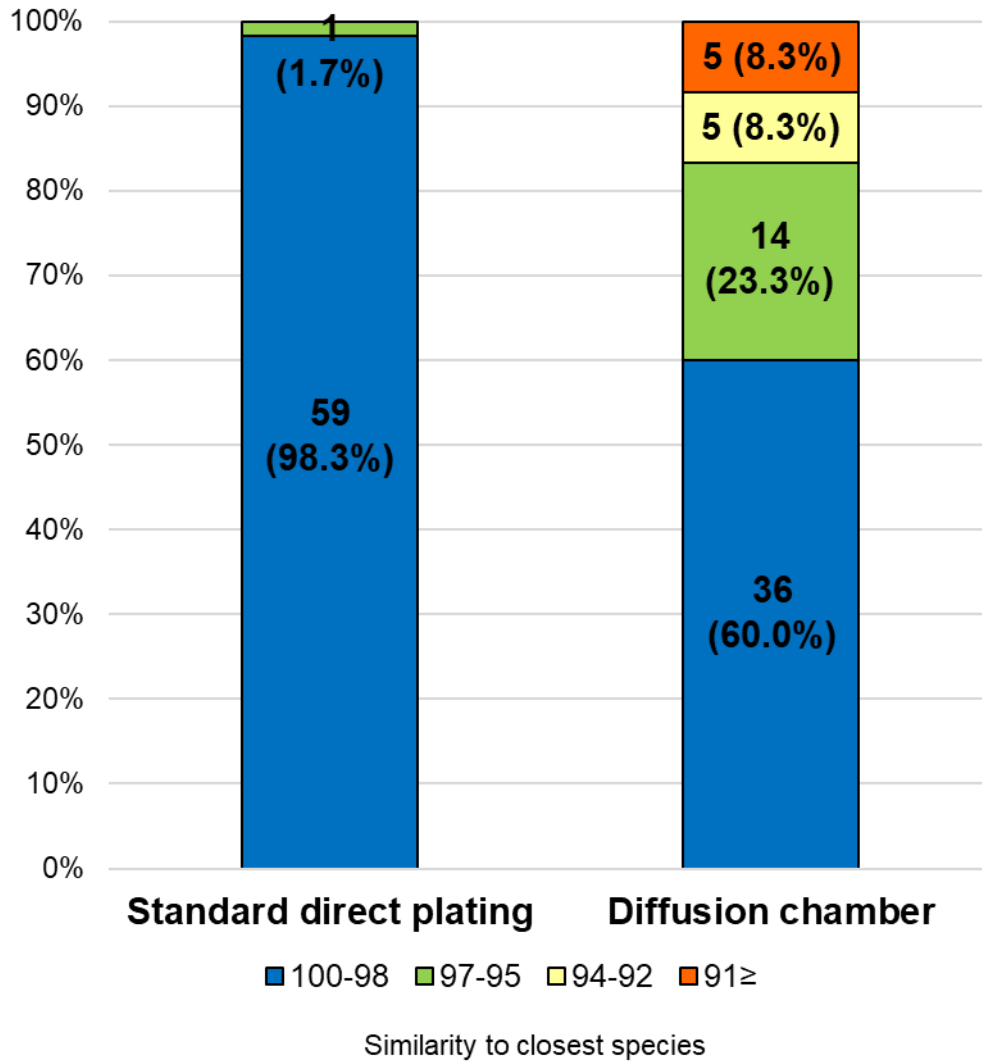

704

705 Figure 3. Similarity among the isolates from each cultivation method based on the 16S rRNA  
706 gene to the closest known relative in GenBank. Numbers in the bar graphs represent OTUs  
707 for each similarity level and its ratio (%).

708

709

710

711

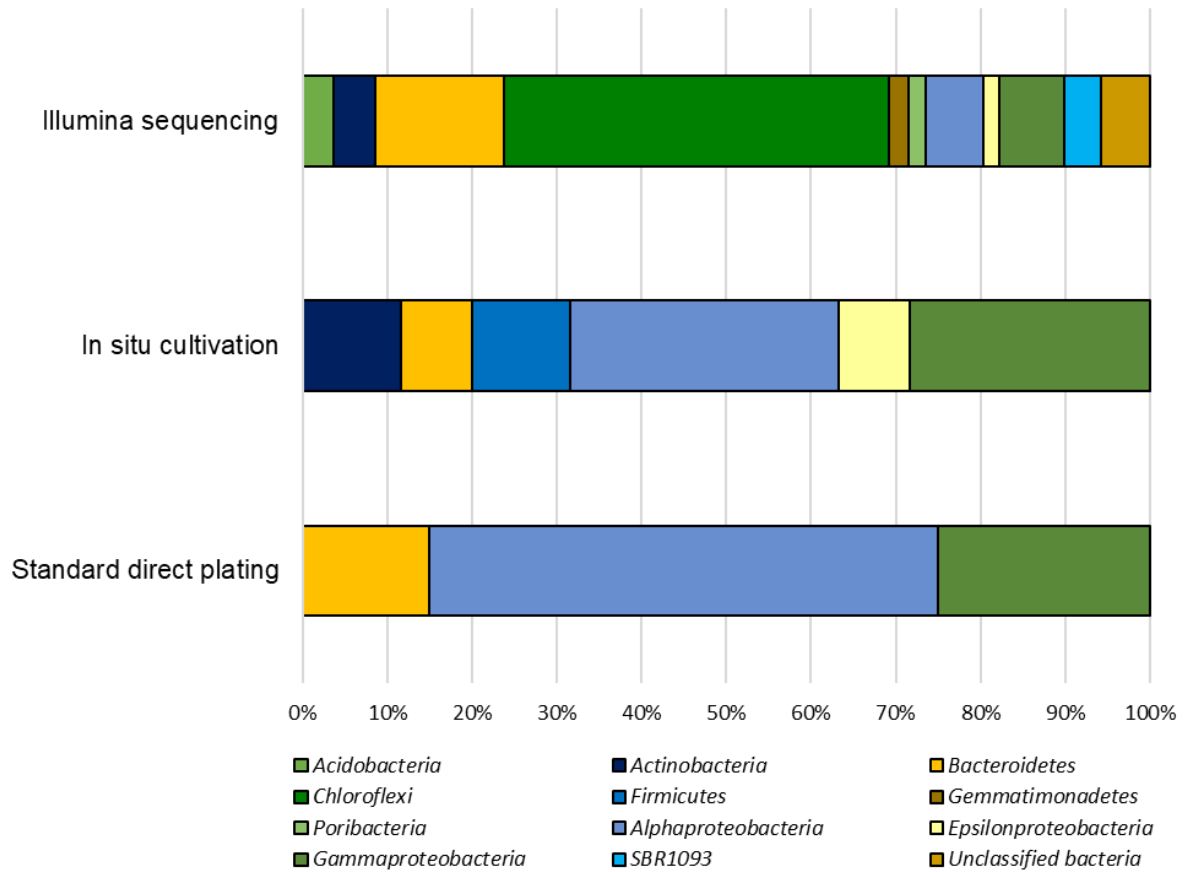

713 Figure 4. Phylogenetic distribution of 16S rRNA gene sequences of sponge-associated  
714 bacteria from the original sample (*Theonella swinhoei*) and isolates obtained by *in situ*  
715 cultivation and standard direct plating methods.

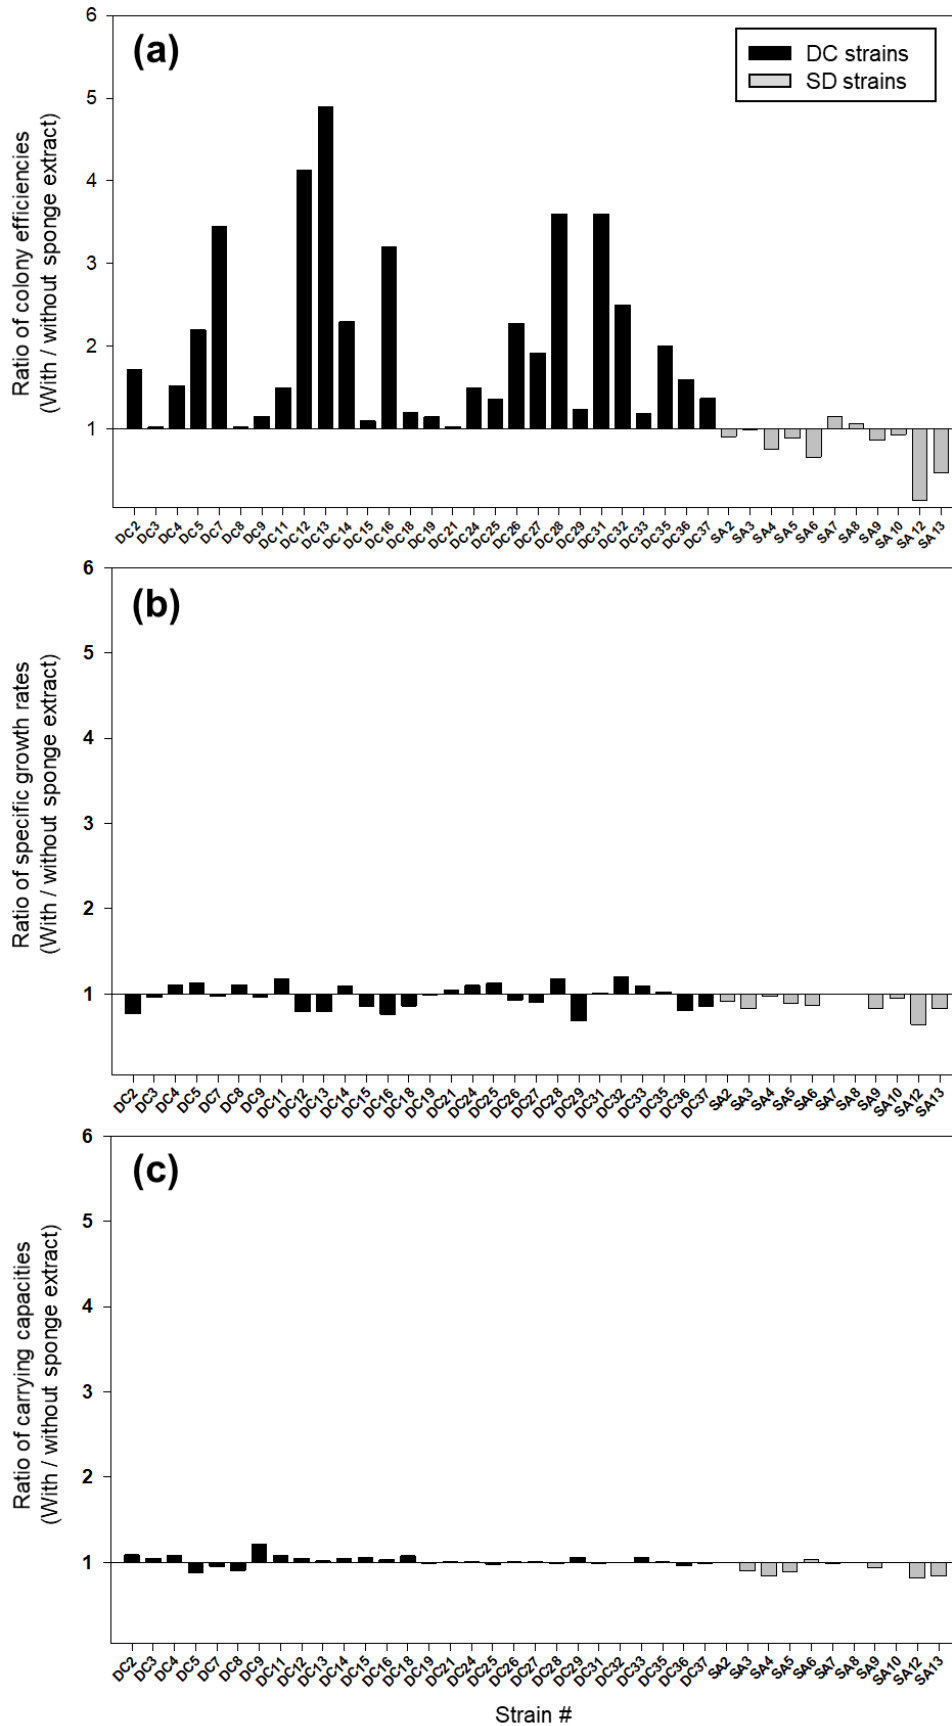

723 Figure 5. Effect of the sponge extract on starvation recovery (a), specific growth rate (b) and  
724 carrying capacity (c) of the *in situ* and SDP strains. The ratio of colony efficiencies between  
725 the value measured under two culture conditions (colony numbers on the agar medium with  
726 the sponge extract/colony numbers on the agar medium without the sponge extract) was  
727 calculated for each selected strain (a). The ratio of the specific growth rate ( $\mu$ ) between the  
728 value measured under the two culture conditions ( $\mu$  with the sponge extract/ $\mu$  without the  
729 sponge extract) was calculated for each tested strain (b). The ratio of the carrying capacity  
730 (maximum value of OD600) between the value measured under the two culture conditions  
731 (carrying capacity with the sponge extract/ carrying capacity without the sponge extract) was  
732 calculated for each tested strain (c).

733

734

735

736

737

738

739

740

741

742

743

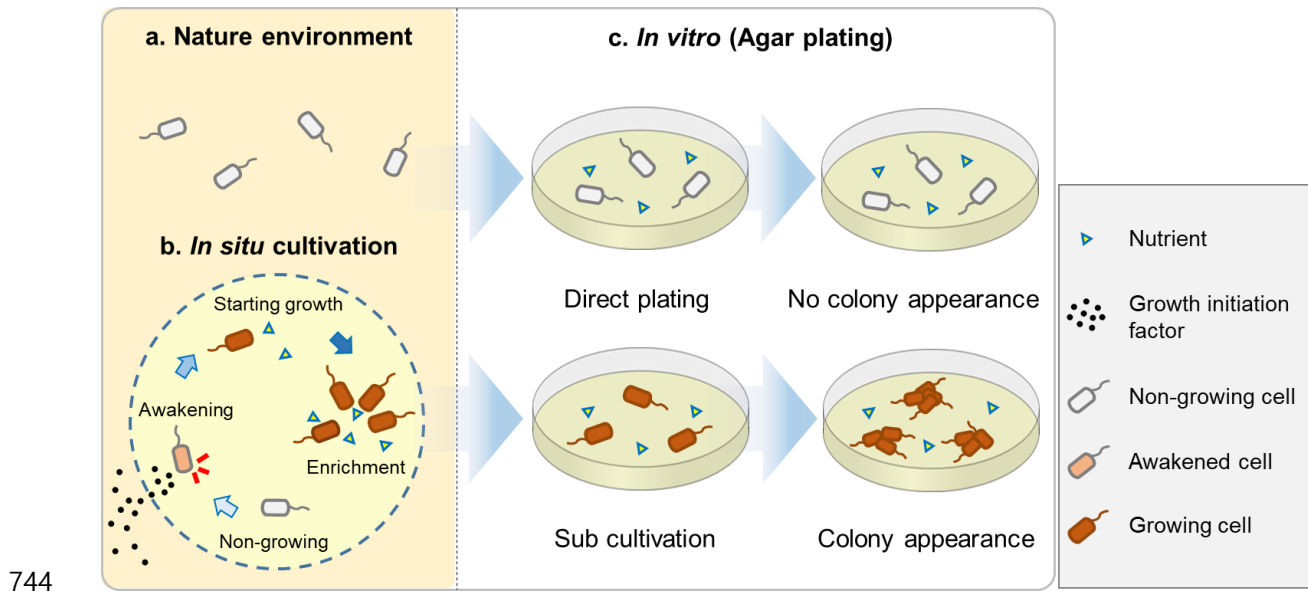

745 Figure 6. Hypothesis explaining how *in situ* cultivation yields different culture collections  
746 from microbial recovery in a natural environment; certain microbial types are non-growing  
747 (dormant) to survive unfavorable conditions such as nutrient limited condition (a); during *in*  
748 *situ* cultivation dormant microbes resuscitate from non-growing state stimulated by growth  
749 initiation factor from outside environments, then they started to grow and enriched inside  
750 supported by sufficient nutrients in the chamber (b); non-growing microbes requiring growth  
751 initiation factor for their awakening, do not start to grow when they were directly inoculated  
752 on an agar plate, and resulting no visible colony appearance; on the other hand, when they  
753 were sub-cultured after the *in situ* cultivation, they continuously grow on an agar plate, and  
754 resulting visible colony appearance (c).

755

756

757

758

## 759 **Figure Legends**

760 Figure 1. Flowchart of the experimental steps for microbial cultivation from marine sponges  
761 (a) and diffusion chamber (DC) cultivation method applied in the present study: a photo  
762 showing structure of the chamber (b), a photo showing installation of DC device into the  
763 marine sponge (c), a schematic image showing the principle of DC (d).

764 Figure 2. Venn diagram consisting of phylogenetic trees based on the 16S rRNA gene of  
765 isolates from each cultivation method. The trees are maximum-likelihood trees (fast bootstrap,  
766 1,000 replicates). Circle size and color represent the number of OTUs (defined at 97% 16S  
767 rRNA gene sequence identity) and 16S rRNA similarity to the closest known relative in  
768 GenBank, respectively. Represented isolates are also grouped into taxonomic groups (a to f)  
769 at the phylum level (class level for Alpha, Gamma and Epsilon Proteobacteria) by gray  
770 elliptical circles. Circles with pointed arrows indicate species that are overlapped among the  
771 isolates in the different cultivation methods. The numbers in parentheses show the numbers  
772 of novel species. The outer circle area corresponds to the number of isolated OTUs from each  
773 cultivation method.

774 Figure 3. Similarity among the isolates from each cultivation method based on the 16S rRNA  
775 gene to the closest known relative in GenBank. Numbers in the bar graphs represent OTUs  
776 for each similarity level and its ratio (%).

777 Figure 4. Phylogenetic distribution of 16S rRNA gene sequences of sponge-associated  
778 bacteria from the original sample (*Theonella swinhoei*) and isolates obtained by *in situ*  
779 cultivation and standard direct plating methods.

780 Figure 5. Effect of the sponge extract on starvation recovery (a), specific growth rate (b) and  
781 carrying capacity (c) of the *in situ* and SDP strains. The ratio of colony efficiencies between

782 the value measured under two culture conditions (colony numbers on the agar medium with  
783 the sponge extract/colony numbers on the agar medium without the sponge extract) was  
784 calculated for each selected strain (a). The ratio of the specific growth rate ( $\mu$ ) between the  
785 value measured under the two culture conditions ( $\mu$ ) with the sponge extract/ $\mu$  without the  
786 sponge extract) was calculated for each tested strain (b). The ratio of the carrying capacity  
787 (maximum value of OD600) between the value measured under the two culture conditions  
788 (carrying capacity with the sponge extract/ carrying capacity without the sponge extract) was  
789 calculated for each tested strain (c).

790 Figure 6. Hypothesis explaining how *in situ* cultivation yields different culture collections  
791 from microbial recovery in a natural environment; certain microbial types are non-growing  
792 (dormant) to survive unfavorable conditions such as nutrient limited condition (a); during *in*  
793 *situ* cultivation dormant microbes resuscitate from non-growing state stimulated by growth  
794 initiation factor provided from outside environments, then they started to grow and enriched  
795 inside supported by sufficient nutrients in the chamber (b); non-growing microbes requiring  
796 growth initiation factor for their awakening, do not start to grow when they were directly  
797 inoculated on an agar plate, and resulting no visible colony appearance; on the other hand,  
798 when they were sub-cultured after the *in situ* cultivation, they continuously grow on an agar  
799 plate, and resulting visible colony appearance (c).

800

801

802

803



804

805 **Supplemental Materials**

806 Table S1. Phylogenetic affiliations of isolates with the DC method on the basis of 16S rRNA  
807 gene sequences.

808 Table S2. Phylogenetic affiliations of isolates with the SDP method on the basis of 16S rRNA  
809 gene sequences.

810 Figure S1. The specific growth rate for each tested strain measured under the two culture  
811 conditions (the medium with and without the sponge extract).

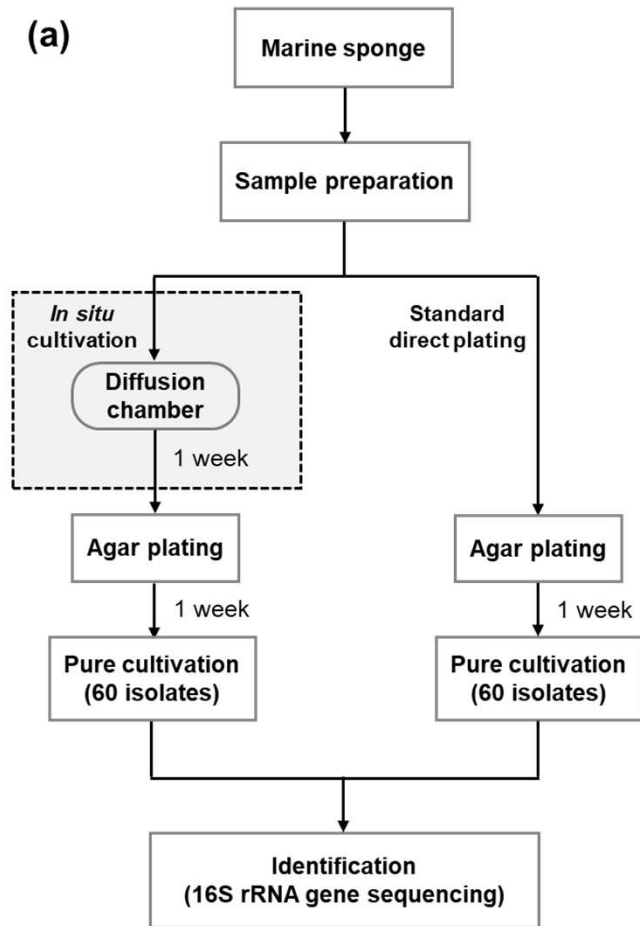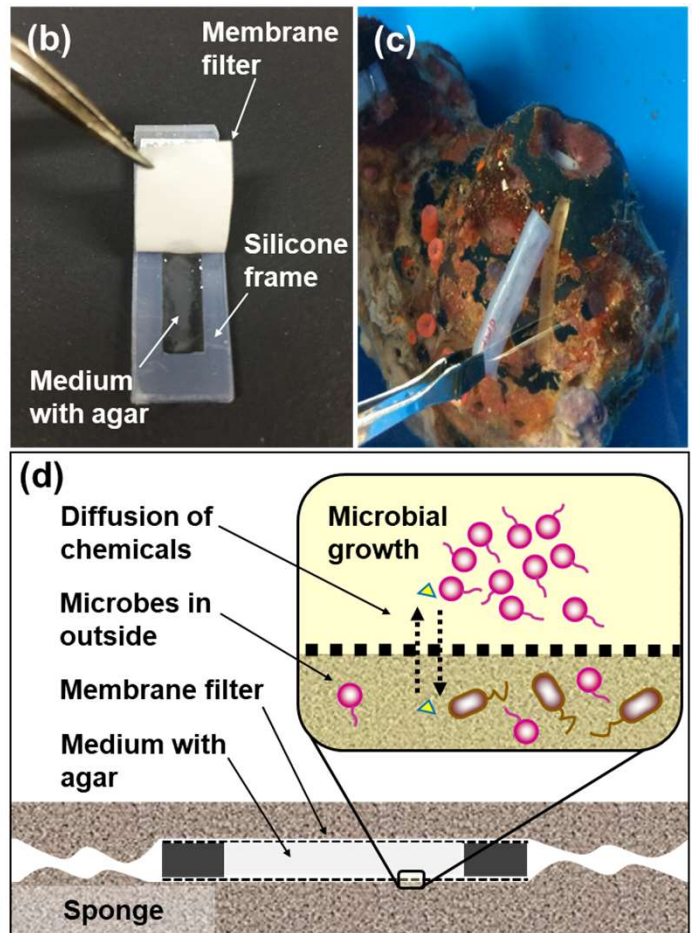

## *In situ* cultivation

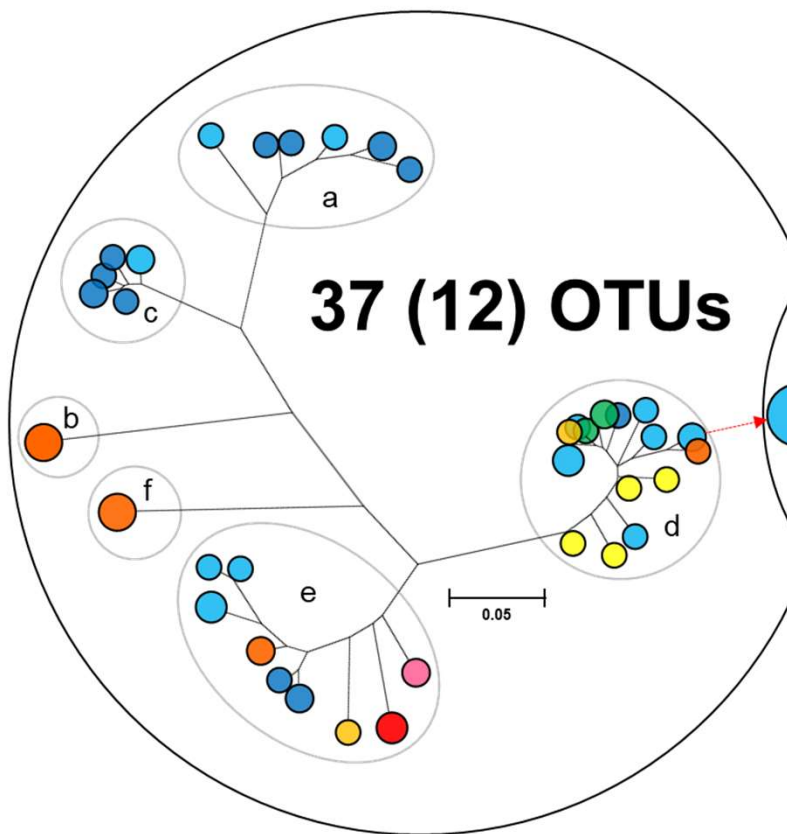

## Standard direct plating

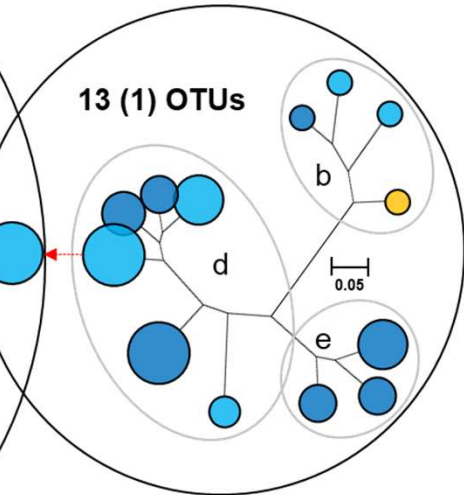

## Taxonomic group

- a. *Actinobacteria*
- b. *Bacteroidetes*
- c. *Firmicutes*
- d. *Alphaproteobacteria*
- e. *Gammaproteobacteria*
- f. *Epsilonproteobacteria*

## Similarity to closest species (%)

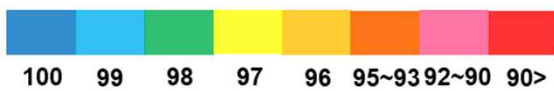

## Isolates number

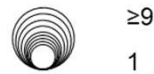

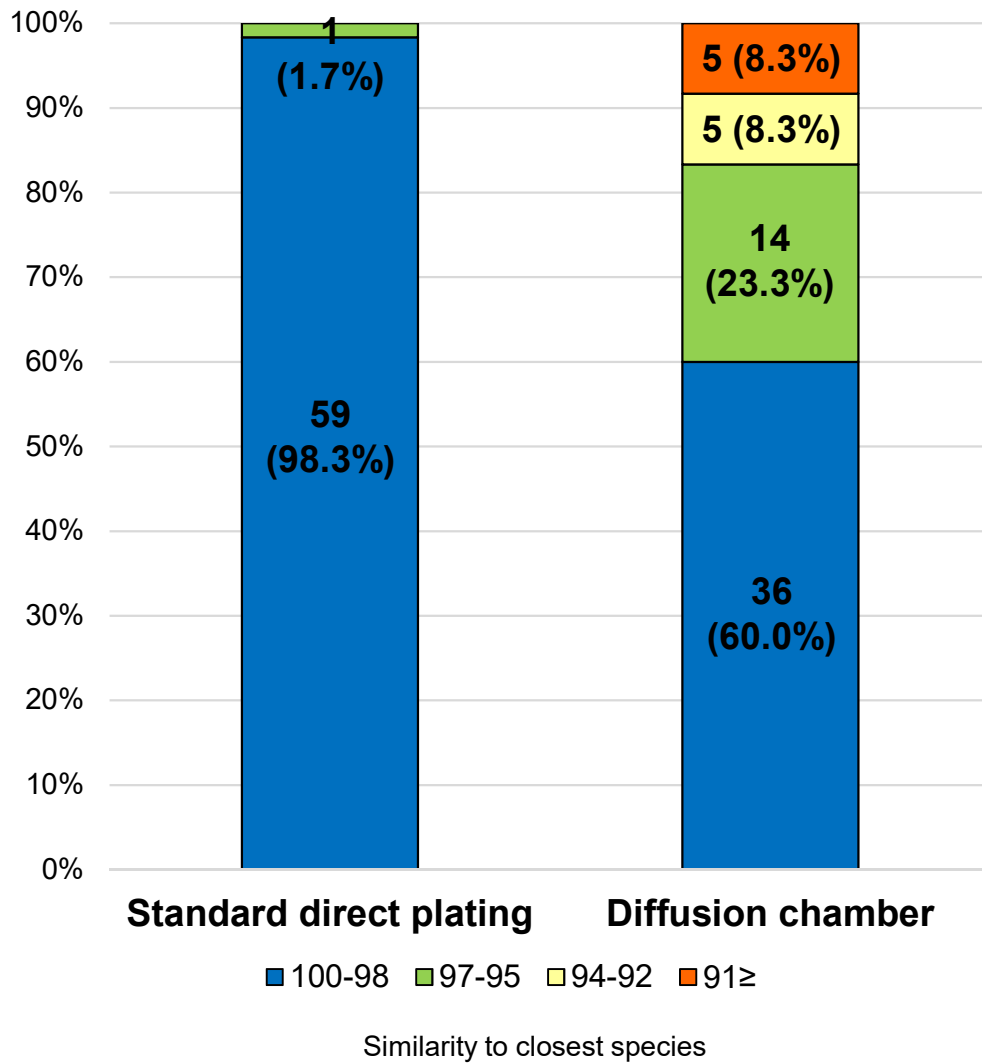

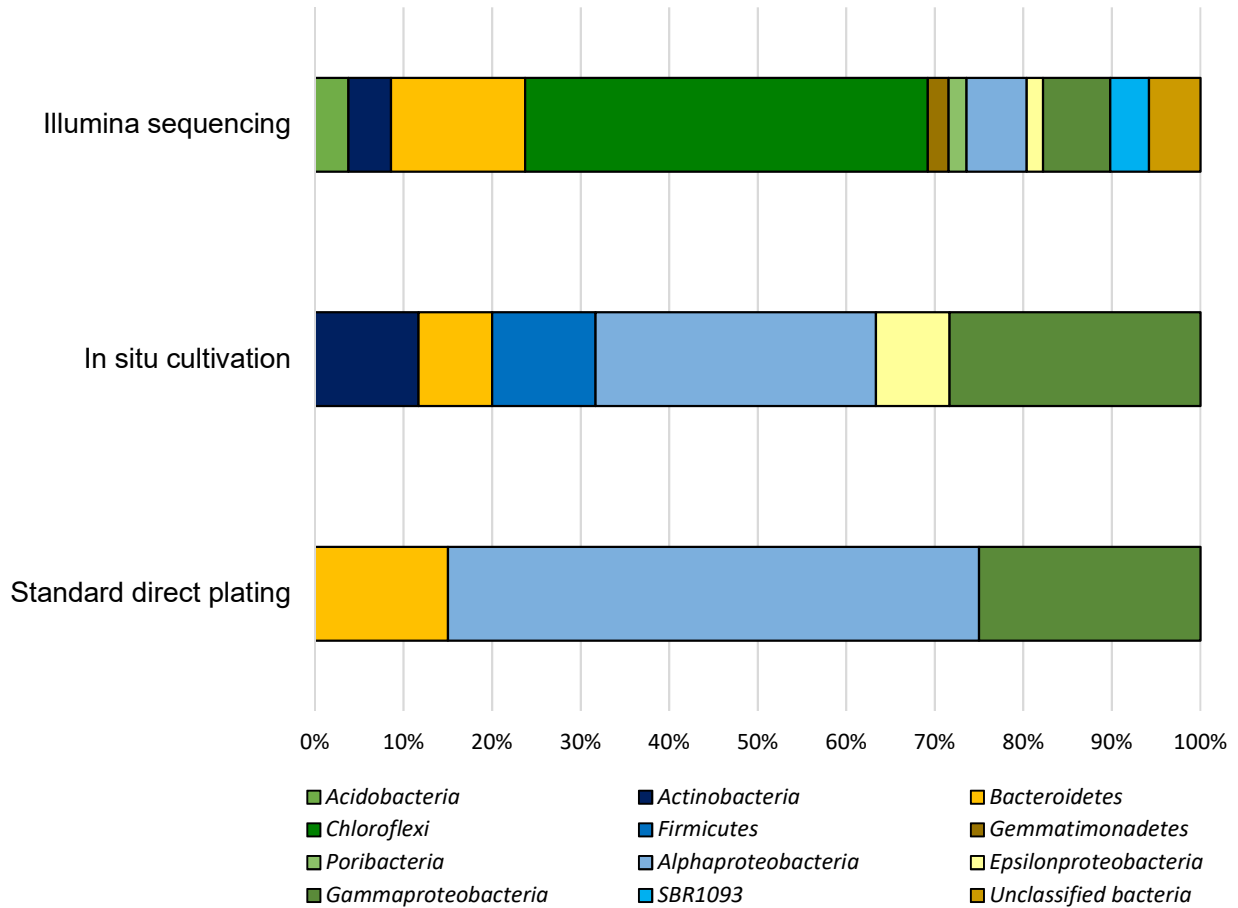

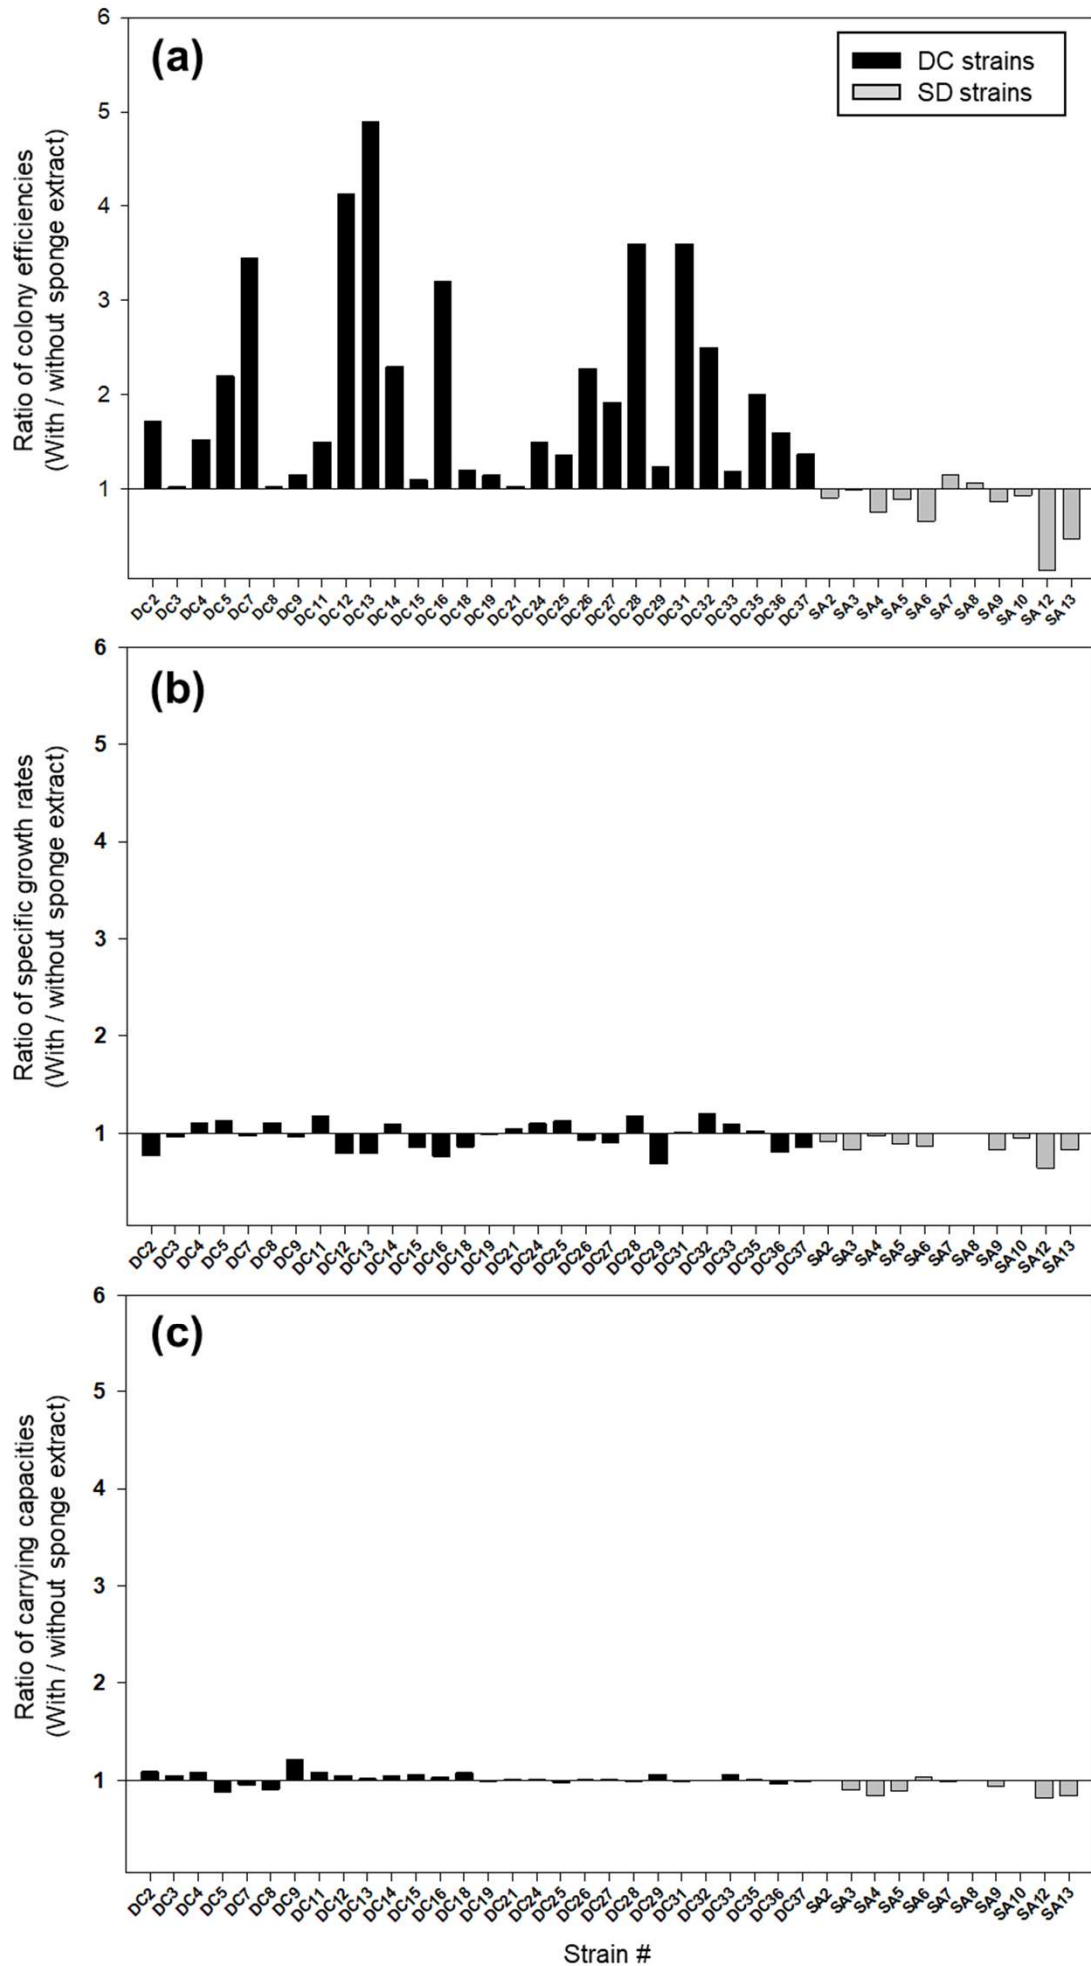

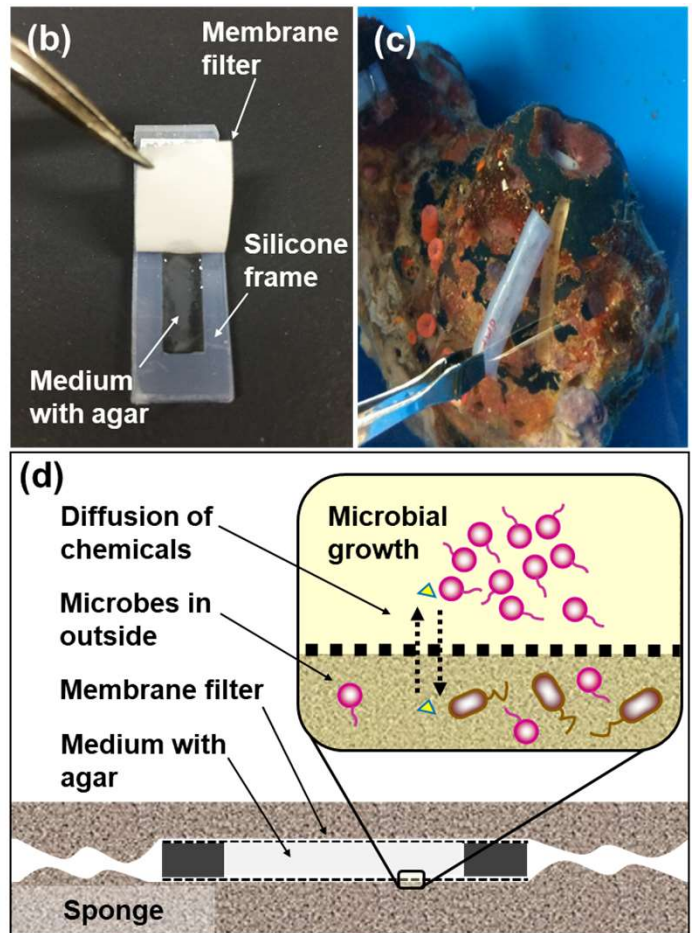



## *In situ* cultivation

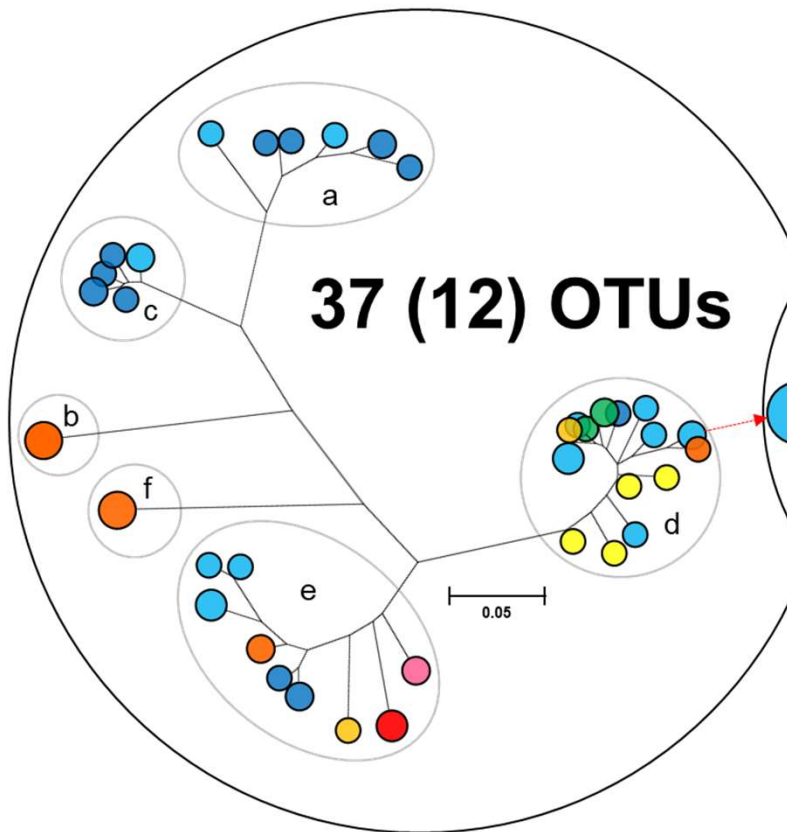

## Standard direct plating



## Taxonomic group

- a. *Actinobacteria*
- b. *Bacteroidetes*
- c. *Firmicutes*
- d. *Alphaproteobacteria*
- e. *Gammaproteobacteria*
- f. *Epsilonproteobacteria*

## Similarity to closest species (%)



## Isolates number











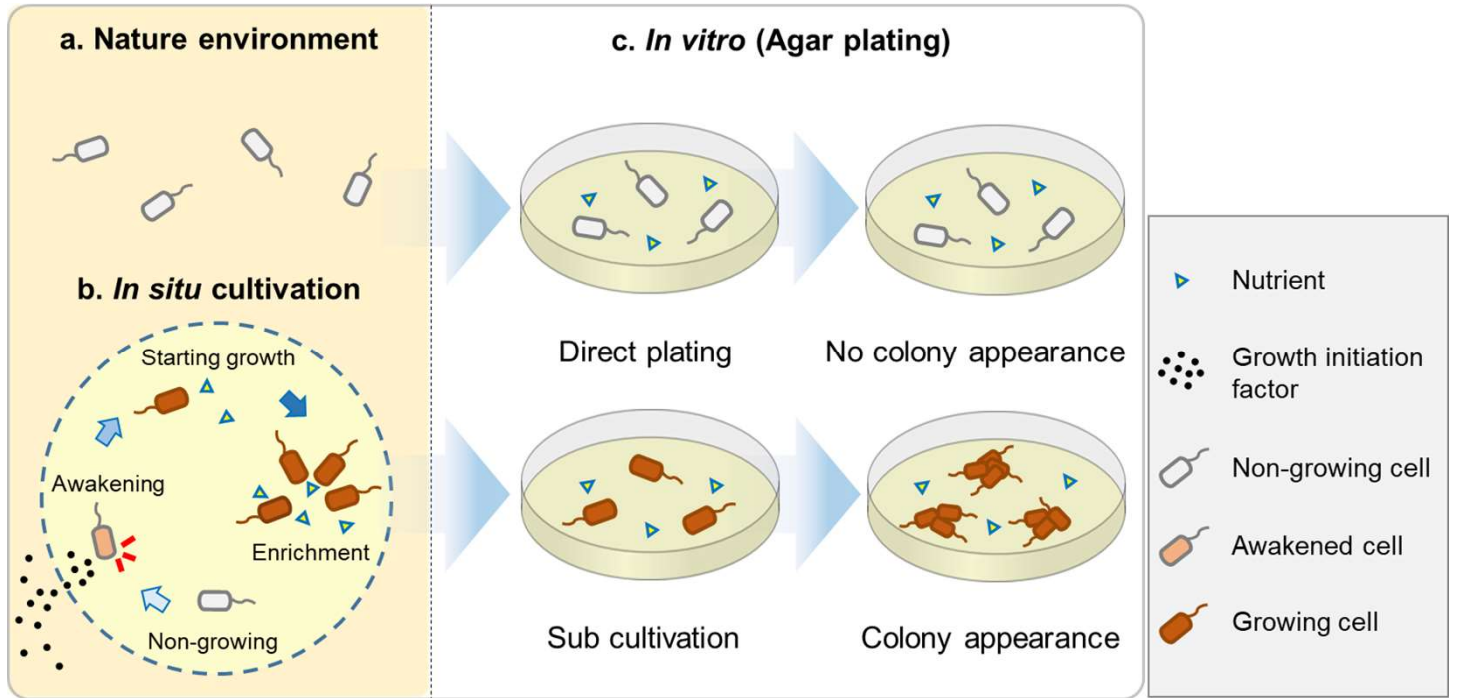

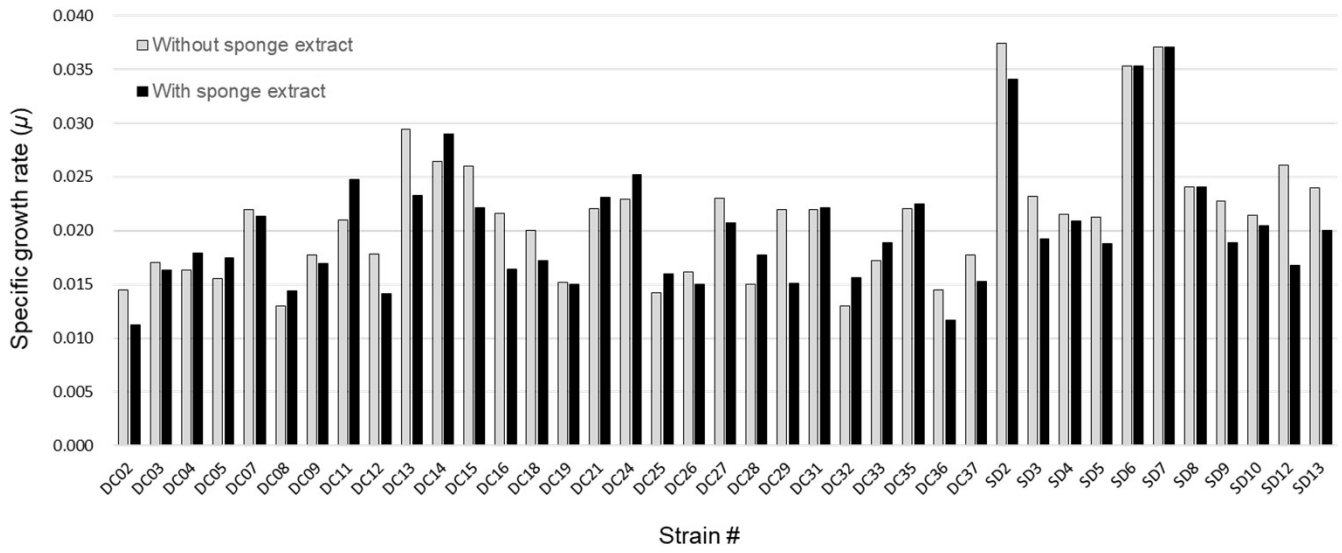

Source: http://biorxiv.org/content/10.1101/590653v1.full.pdf
